# Supplementary material for: Simple practical method for synthesis of trisubstituted imidazoles: an efficient copper catalyzed multicomponent reaction
Source: PubMed Central journal article supplement (PMC9034145; doi:10.1039/d1ra01767e), 2021-06-22

# Supporting Information

## Simple Practical Method for Synthesis of Trisubstituted Imidazoles: An Efficient Copper Catalyzed Multicomponent Reaction

Vikas D. Kadu\*, Ganesh A. Mali, Siddheshwar P. Khadul, Gokul J. Kothe

<sup>a</sup>School of Chemical Sciences, Punyashlok Ahilyadevi Holkar Solapur University  
Solapur- 413255, Maharashtra (India)

\*Corresponding Authors: Email- [vikaskadul@gmail.com](mailto:vikaskadul@gmail.com)

### Contents

|                                                  |   |
|--------------------------------------------------|---|
| Spectral data of trisubstituted imidazoles ..... | 3 |
| 1.1 <sup>1</sup> H NMR of compound: 4a .....     | 3 |
| 1.2 <sup>13</sup> C NMR of compound: 4a .....    | 3 |
| 1.3 <sup>1</sup> H NMR of compound: 4b .....     | 4 |
| 1.4 <sup>13</sup> C NMR of compound: 4b .....    | 4 |
| 1.5 <sup>1</sup> H NMR of compound: 4c .....     | 5 |
| 1.6 <sup>13</sup> C NMR of compound: 4c .....    | 5 |
| 1.7 <sup>1</sup> H NMR of compound: 4d .....     | 6 |
| 1.8 <sup>1</sup> H NMR of compound: 4e .....     | 6 |
| 1.9 <sup>13</sup> C NMR of compound: 4e .....    | 7 |
| 1.10 <sup>1</sup> H NMR of compound: 4f .....    | 7 |
| 1.11 <sup>13</sup> C NMR of compound: 4f .....   | 8 |
| 1.12 <sup>1</sup> H NMR of compound: 4g .....    | 8 |
| 1.13 <sup>13</sup> C NMR of compound: 4g .....   | 9 |
| 1.14 <sup>1</sup> H NMR of compound: 4h .....    | 9 |

|      |                                           |    |
|------|-------------------------------------------|----|
| 1.15 | <sup>13</sup> C NMR of compound: 4h ..... | 10 |
| 1.16 | <sup>1</sup> H NMR of compound: 4i .....  | 10 |
| 1.17 | <sup>13</sup> C NMR of compound: 4i ..... | 11 |
| 1.18 | <sup>1</sup> H NMR of compound: 4j .....  | 11 |
| 1.19 | <sup>1</sup> H NMR of compound: 4k .....  | 12 |
| 1.20 | <sup>13</sup> C NMR of compound: 4k ..... | 12 |
| 1.21 | <sup>1</sup> H NMR of compound: 4l .....  | 13 |
| 1.22 | <sup>13</sup> C NMR of compound: 4l ..... | 13 |
| 1.23 | <sup>1</sup> H NMR of compound: 4m .....  | 14 |
| 1.24 | <sup>13</sup> C NMR of compound: 4m ..... | 14 |
| 1.25 | <sup>1</sup> H NMR of compound: 4n .....  | 15 |
| 1.26 | <sup>13</sup> C NMR of compound: 4n ..... | 15 |
| 1.27 | <sup>1</sup> H NMR of compound: 4o .....  | 16 |
| 1.28 | <sup>13</sup> C NMR of compound: 4o ..... | 16 |
| 1.29 | <sup>1</sup> H NMR of compound: 4p .....  | 17 |
| 1.30 | <sup>13</sup> C NMR of compound: 4p ..... | 17 |
| 1.31 | <sup>1</sup> H NMR of compound: 4q .....  | 18 |
| 1.32 | <sup>13</sup> C NMR of compound: 4q ..... | 18 |
| 1.33 | <sup>1</sup> H NMR of compound: 4r .....  | 19 |
| 1.34 | <sup>13</sup> C NMR of compound: 4r ..... | 19 |
| 1.35 | <sup>1</sup> H NMR of compound: 4s .....  | 20 |
| 1.36 | <sup>13</sup> C NMR of compound: 4s ..... | 20 |
| 1.37 | <sup>1</sup> H NMR of compound: 4t .....  | 21 |
| 1.38 | <sup>13</sup> C NMR of compound: 4t ..... | 21 |

## Spectral data of trisubstituted imidazoles

### 1.1 $^1\text{H}$ NMR of compound: 4a

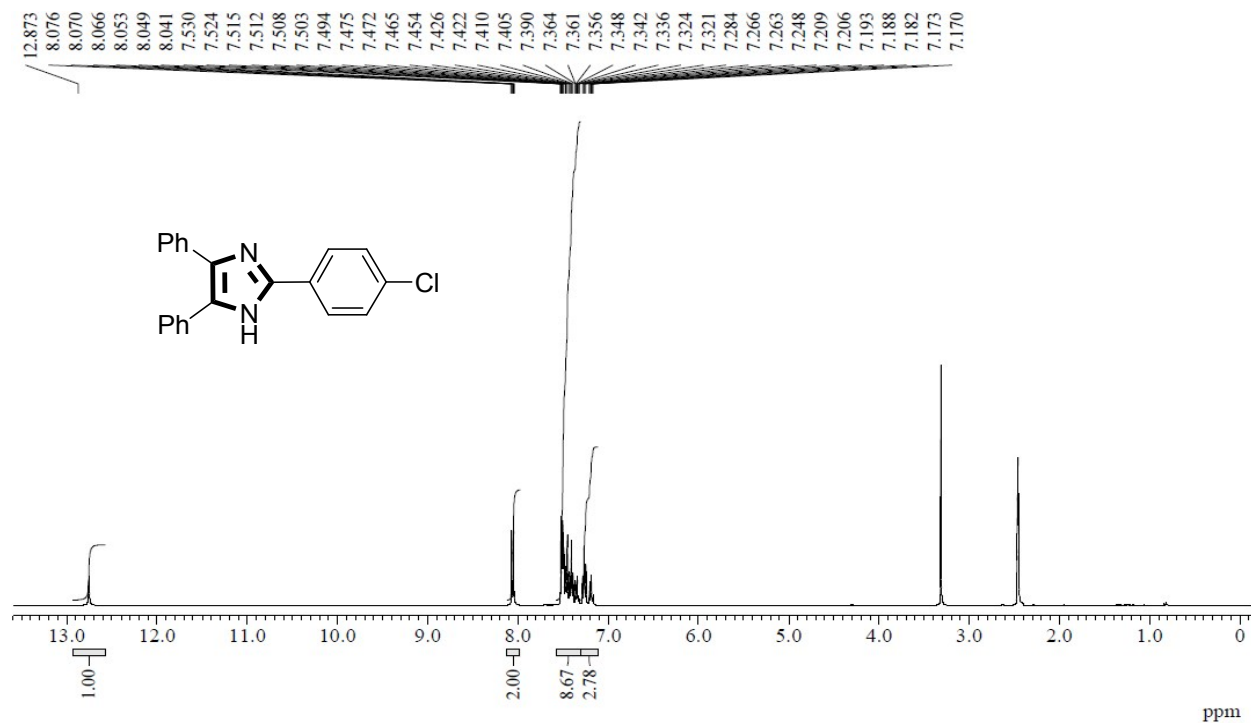

### 1.2 $^{13}\text{C}$ NMR of compound: 4a

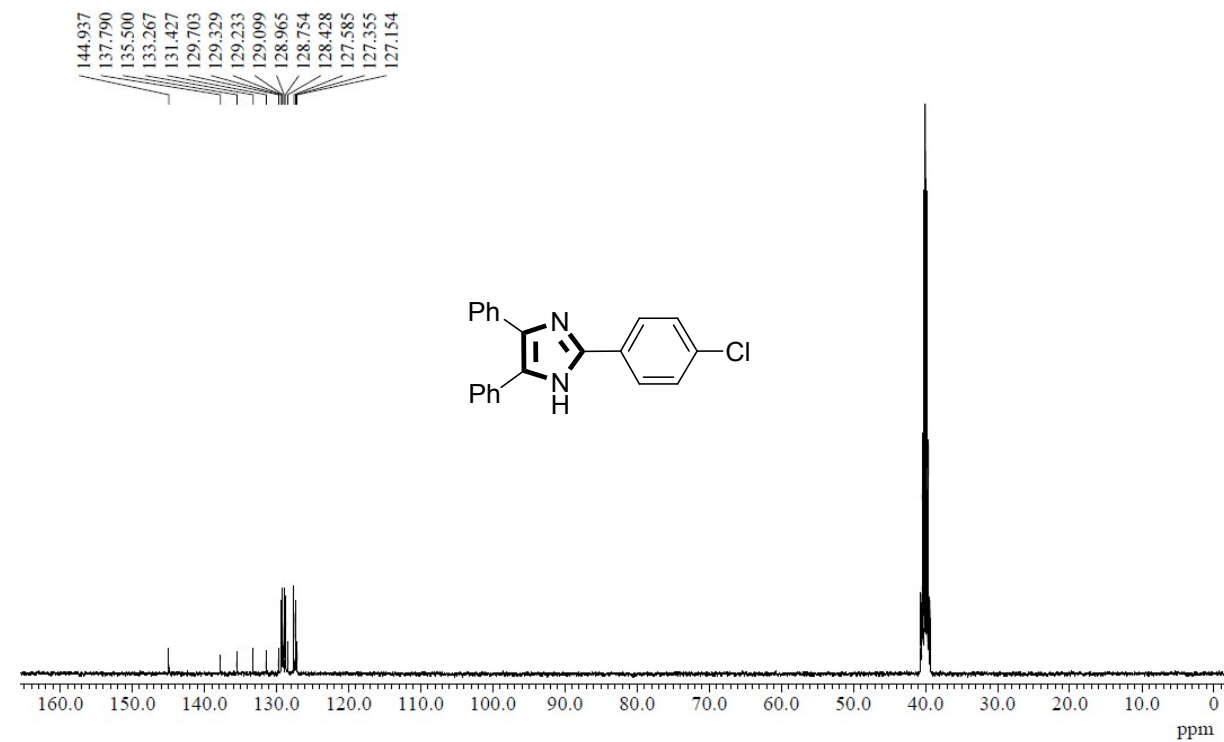

### 1.3 $^1\text{H}$ NMR of compound: **4b**

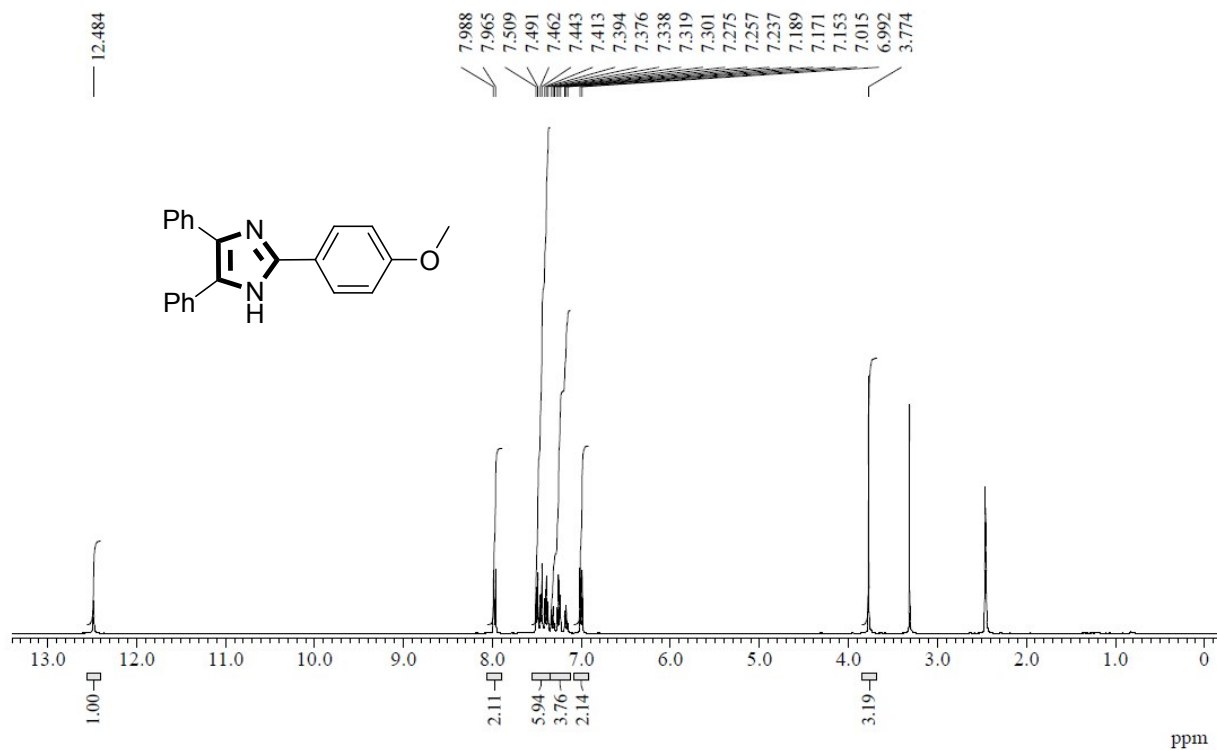

### 1.4 $^{13}\text{C}$ NMR of compound: **4b**

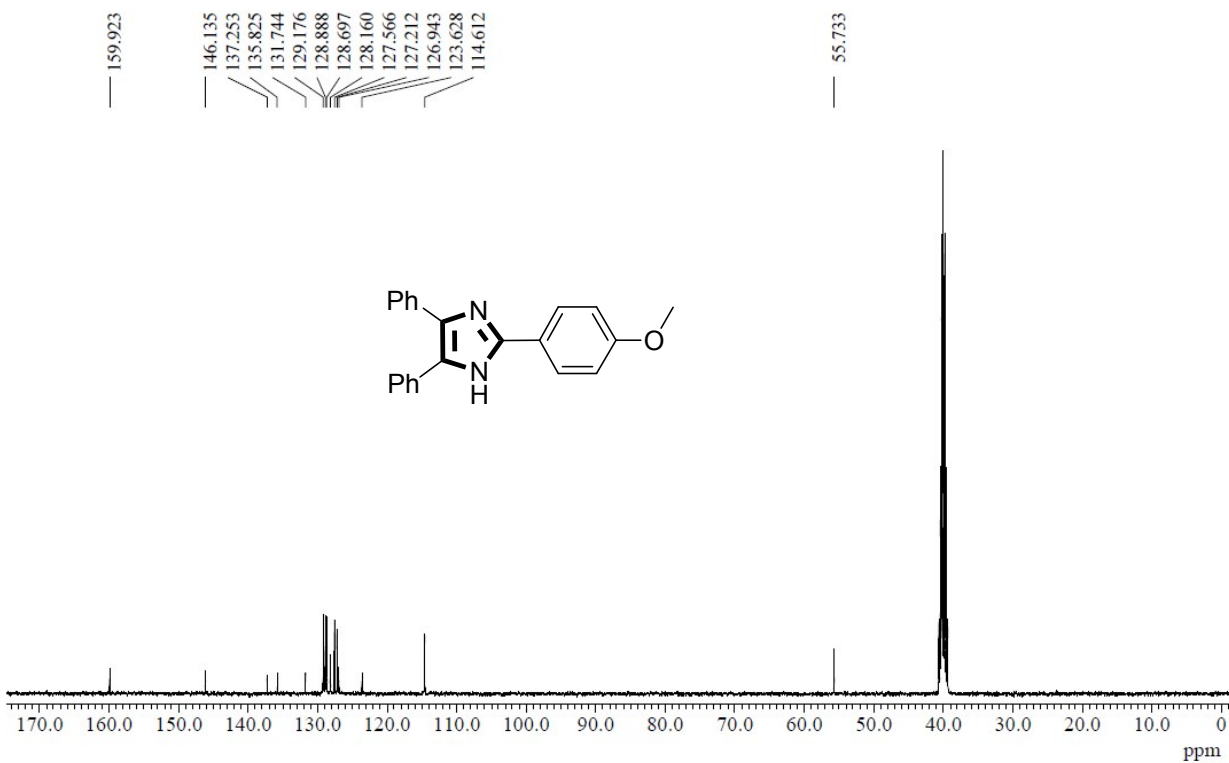

### 1.5 $^1\text{H}$ NMR of compound: **4c**

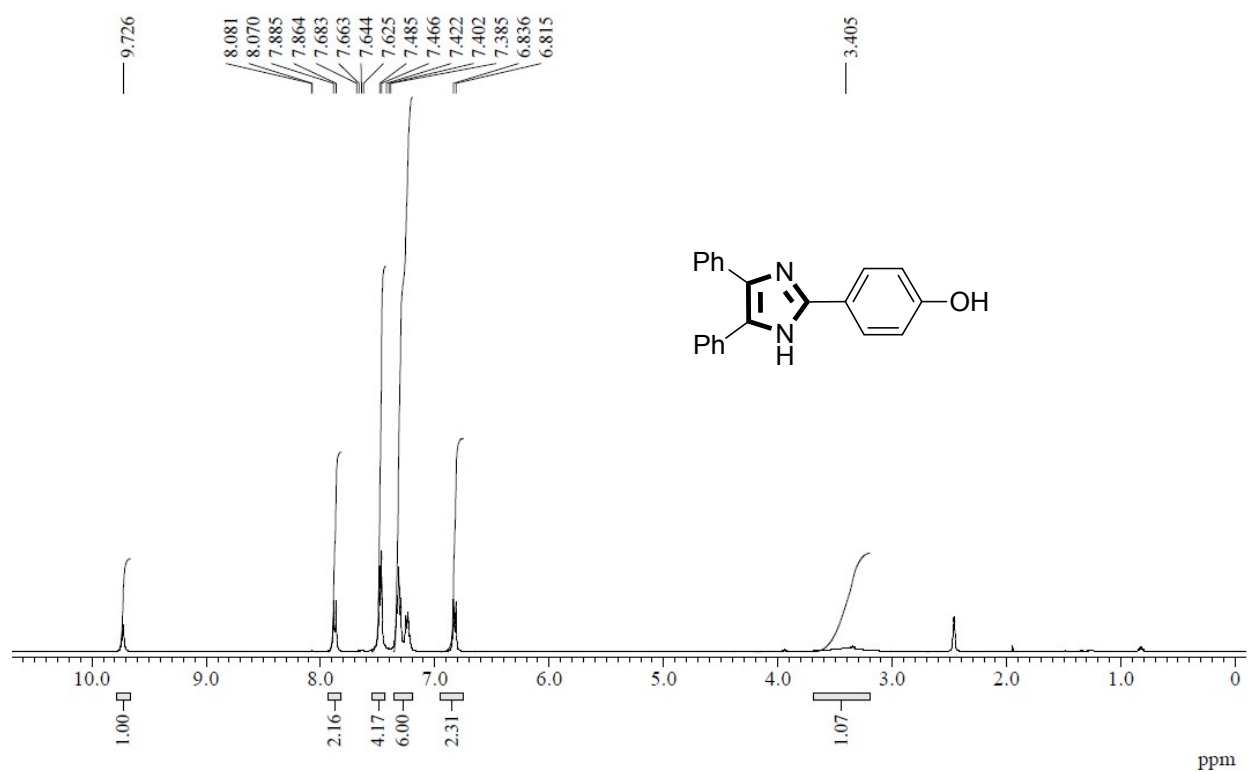

### 1.6 $^{13}\text{C}$ NMR of compound: **4c**

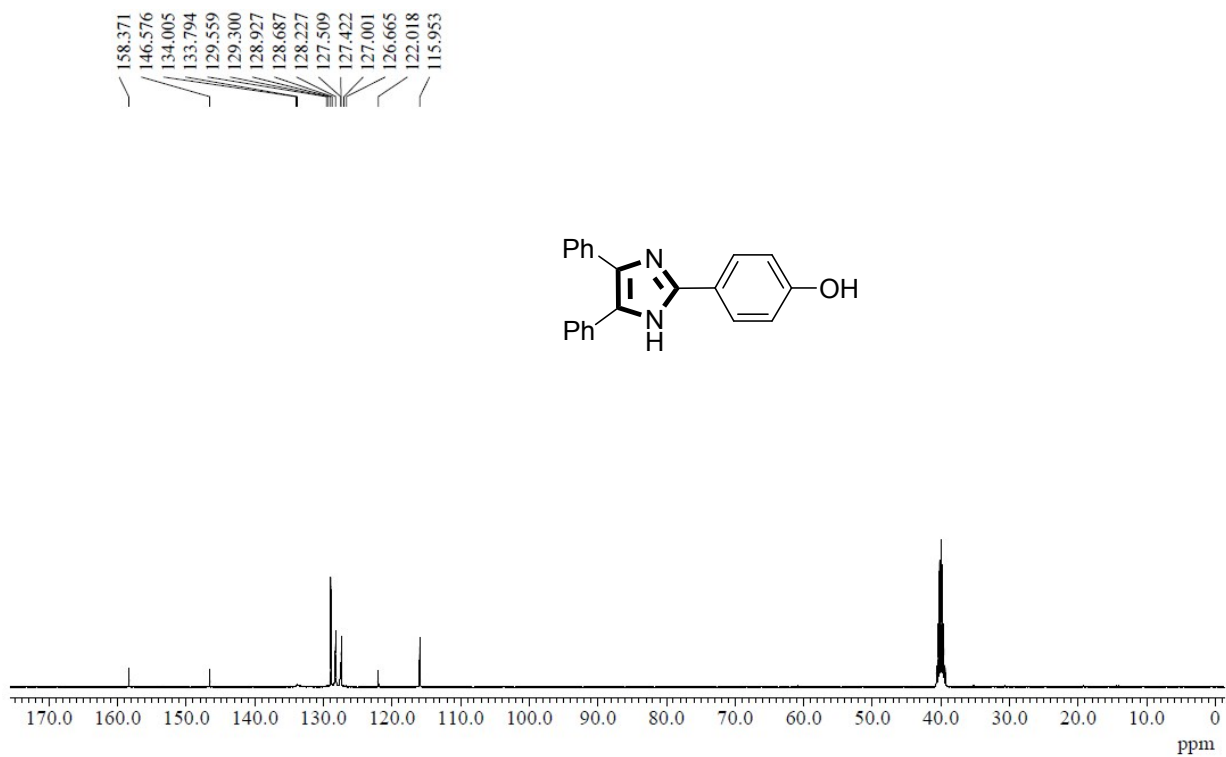

1.7 <sup>1</sup>H NMR of compound: **4d**

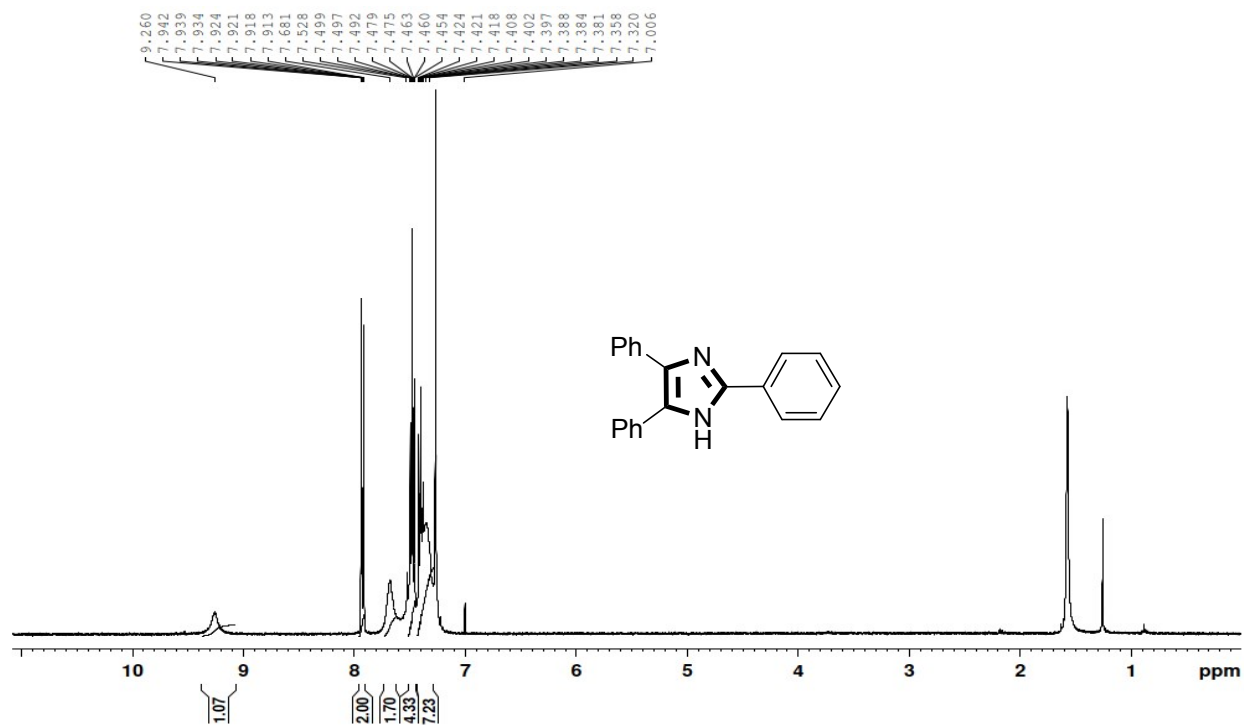

1.8 <sup>1</sup>H NMR of compound: **4e**

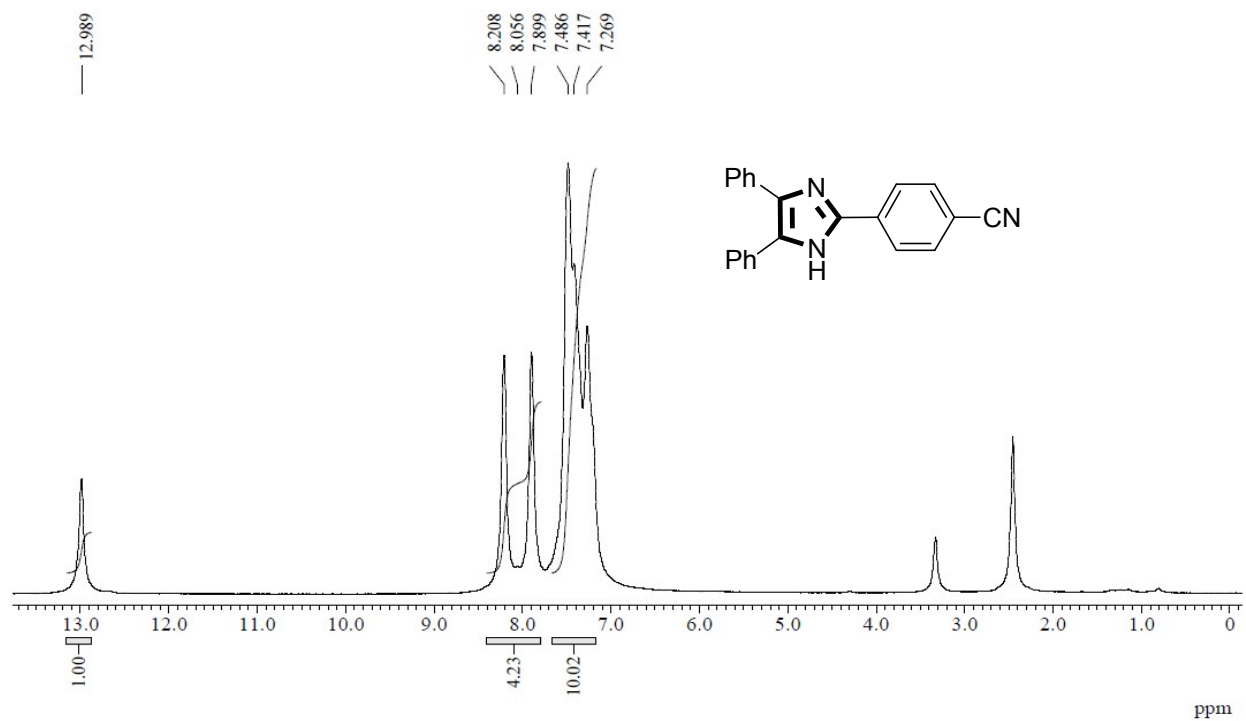

### 1.9 $^{13}\text{C}$ NMR of compound: **4e**

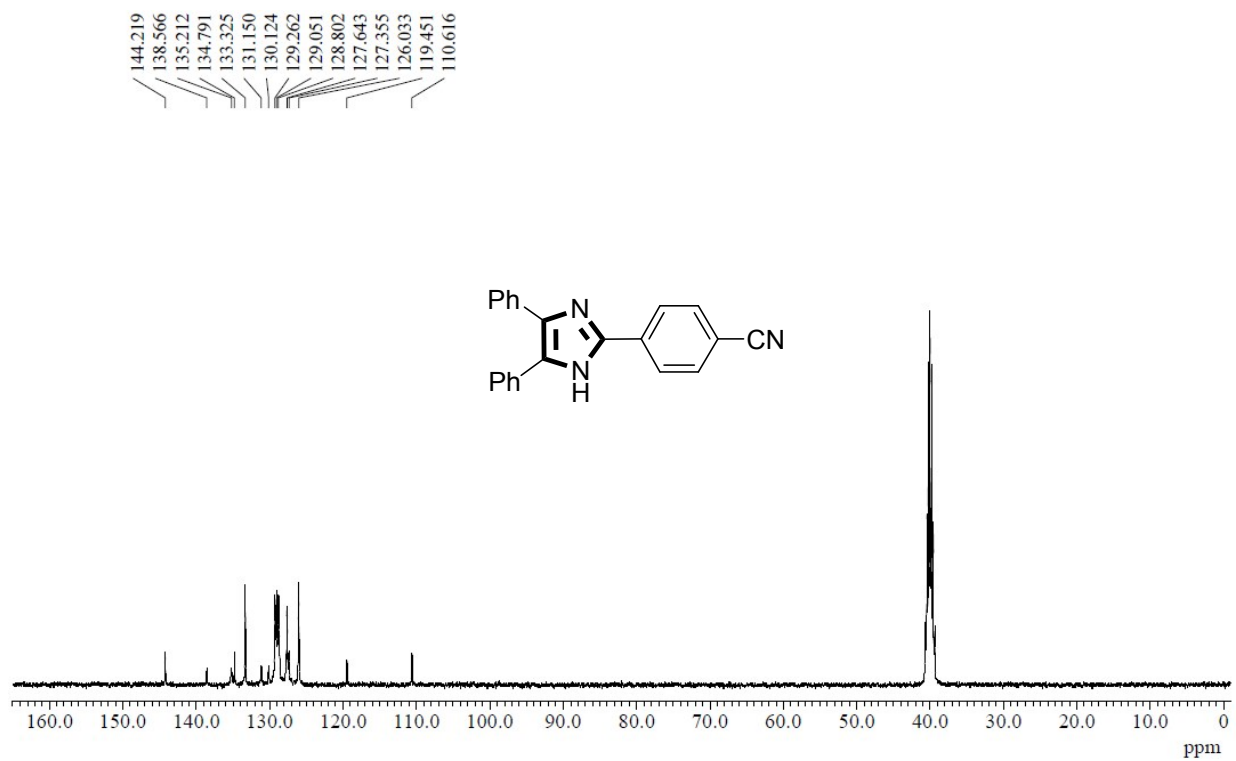

### 1.10 $^1\text{H}$ NMR of compound: **4f**

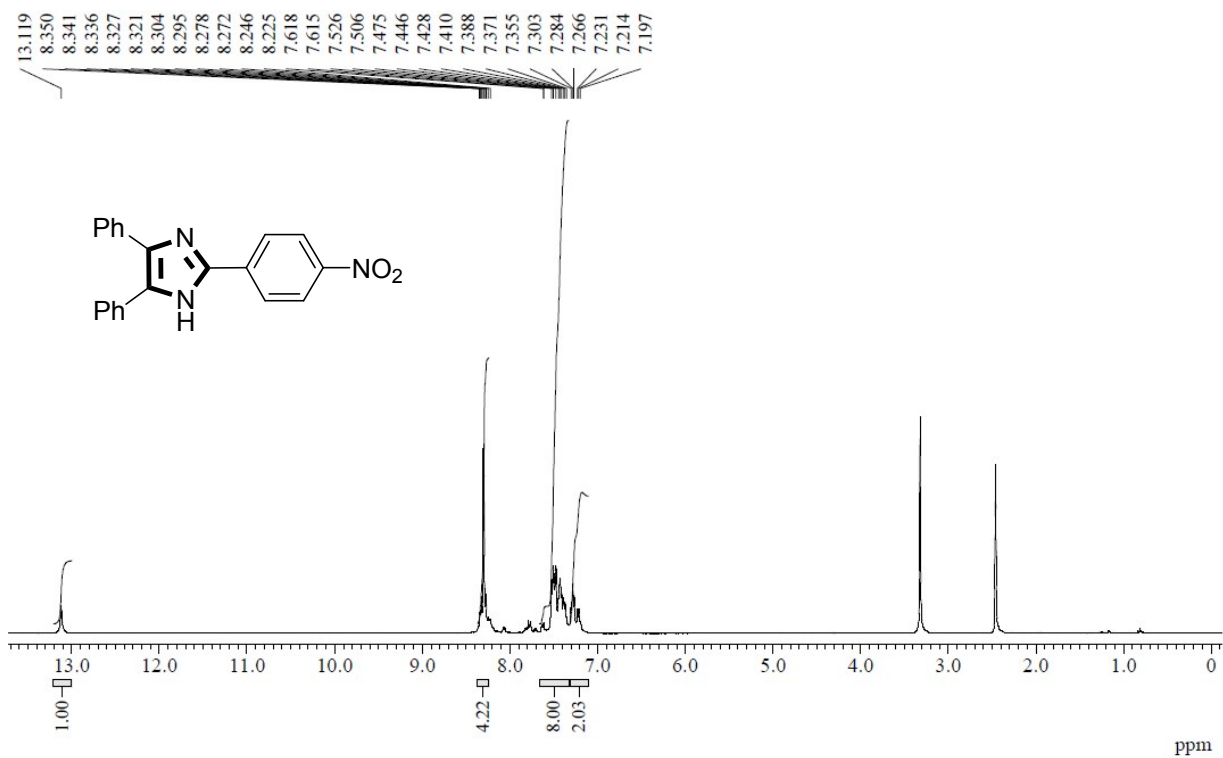

### 1.11 $^{13}\text{C}$ NMR of compound: **4f**

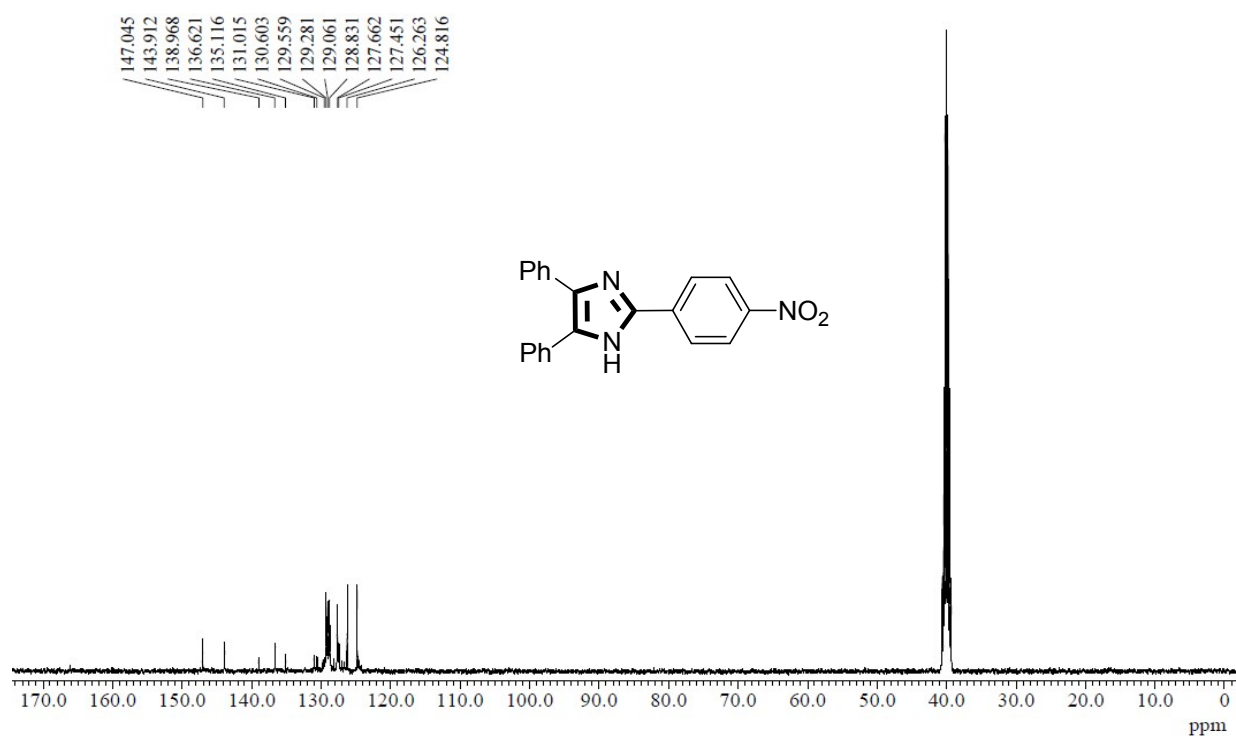

### 1.12 $^1\text{H}$ NMR of compound: **4g**

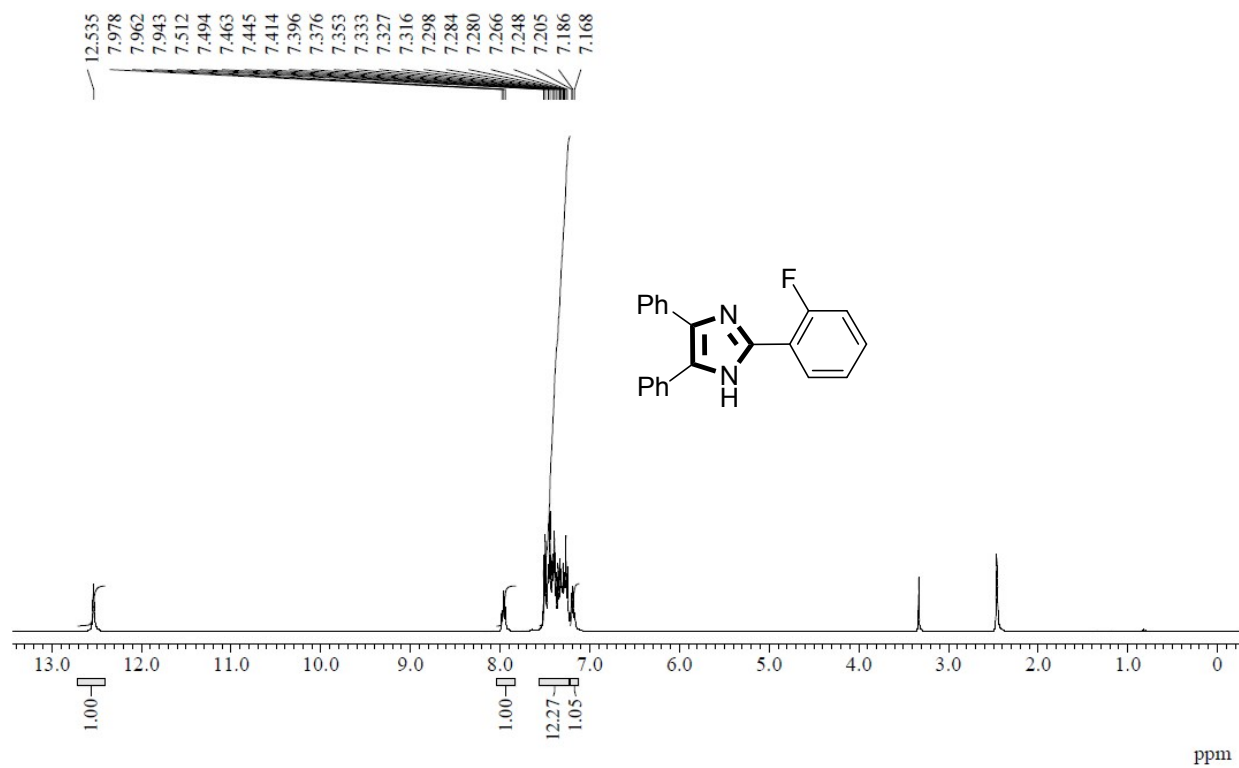



### 1.13 $^{13}\text{C}$ NMR of compound: 4g

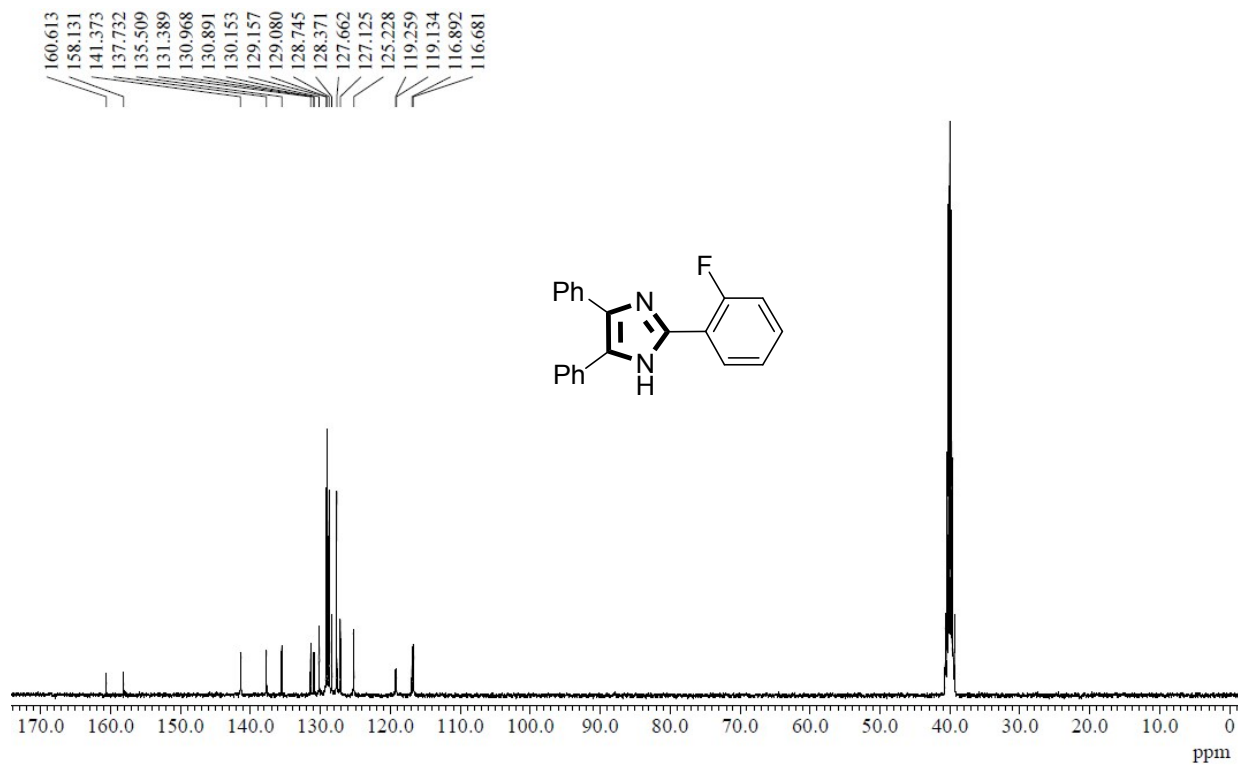

### 1.14 $^1\text{H}$ NMR of compound: 4h

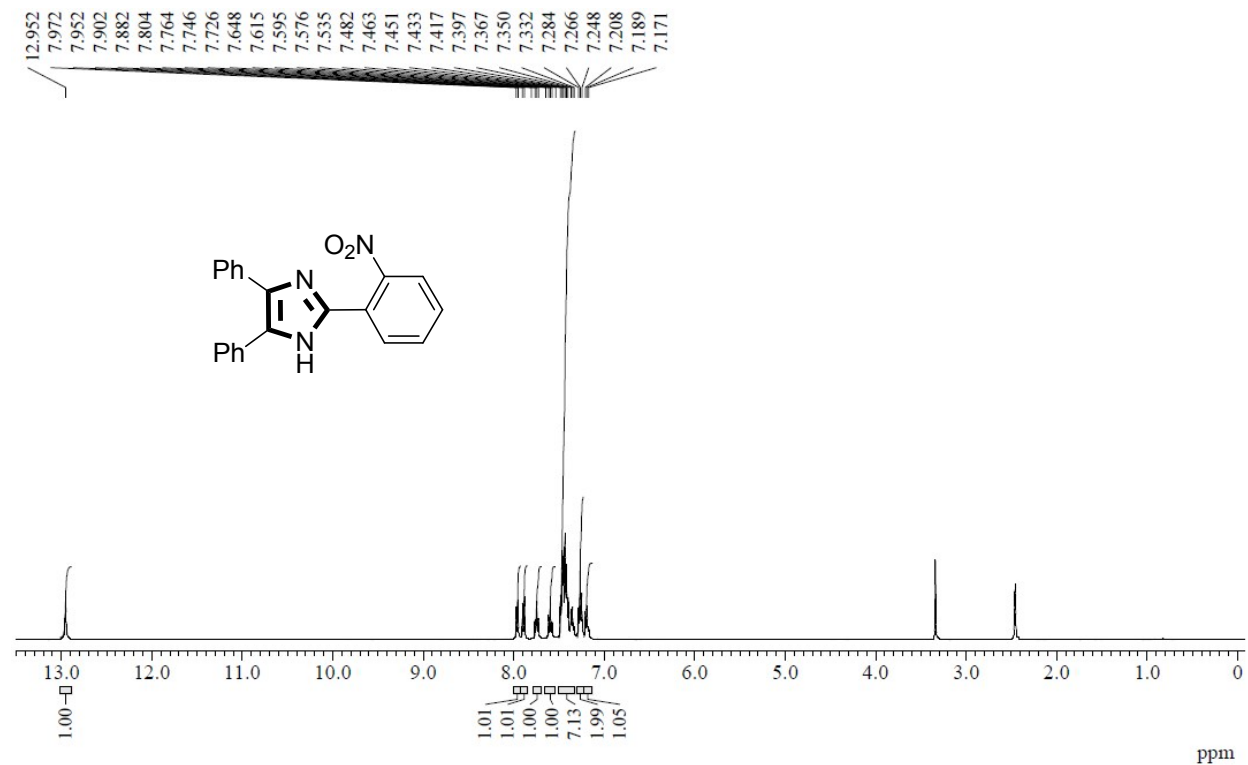

### 1.15 $^{13}\text{C}$ NMR of compound: 4h

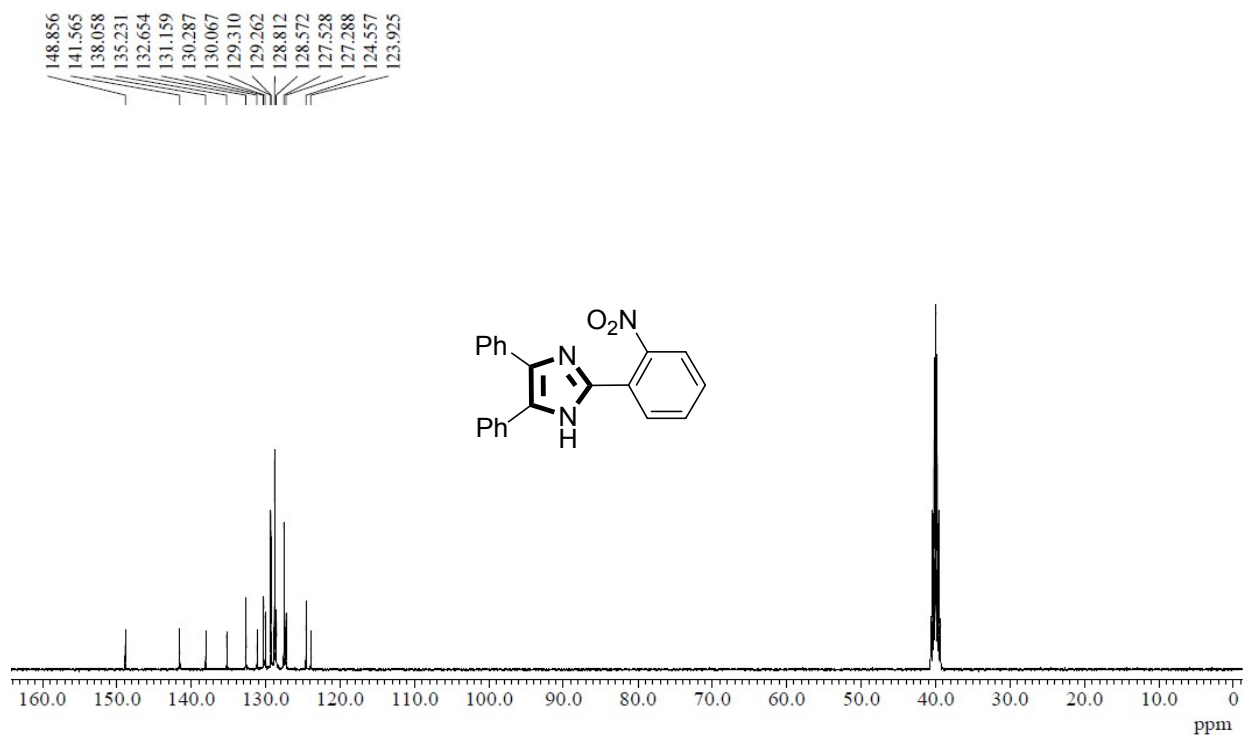

### 1.16 $^1\text{H}$ NMR of compound: 4i

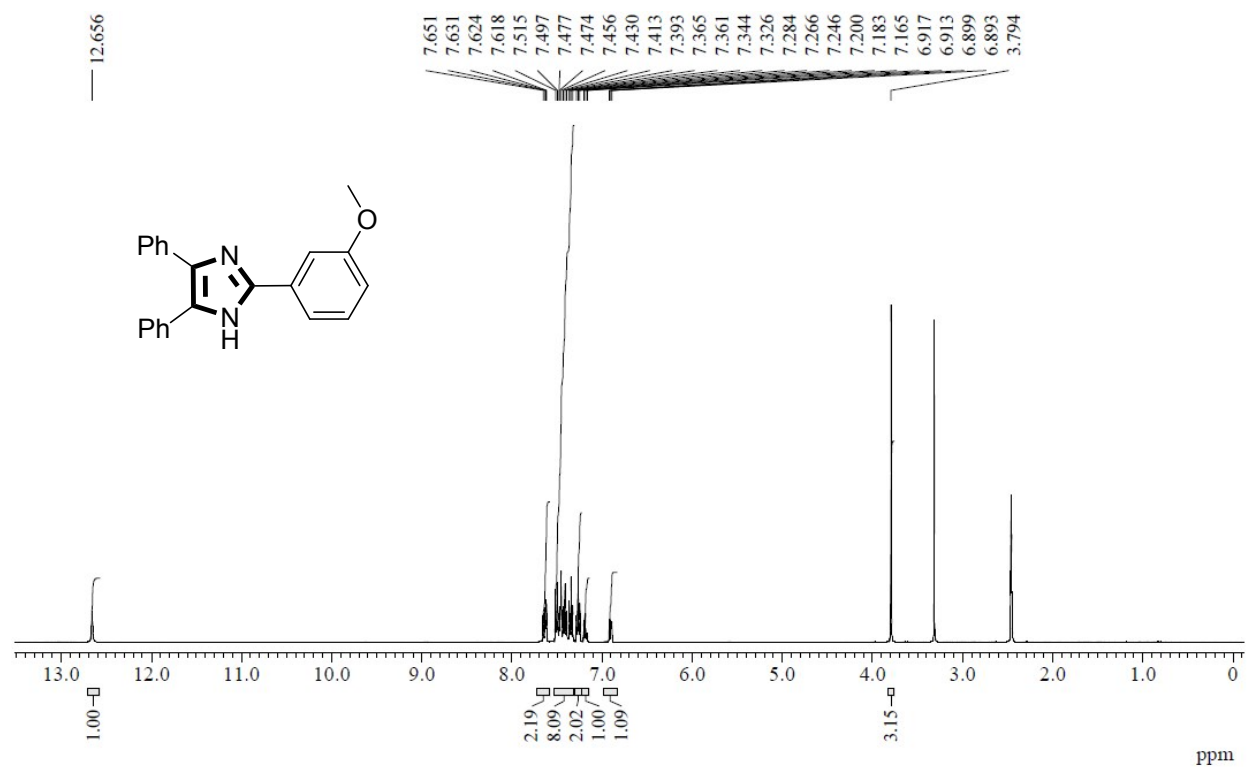

1.17 <sup>13</sup>C NMR of compound: 4i

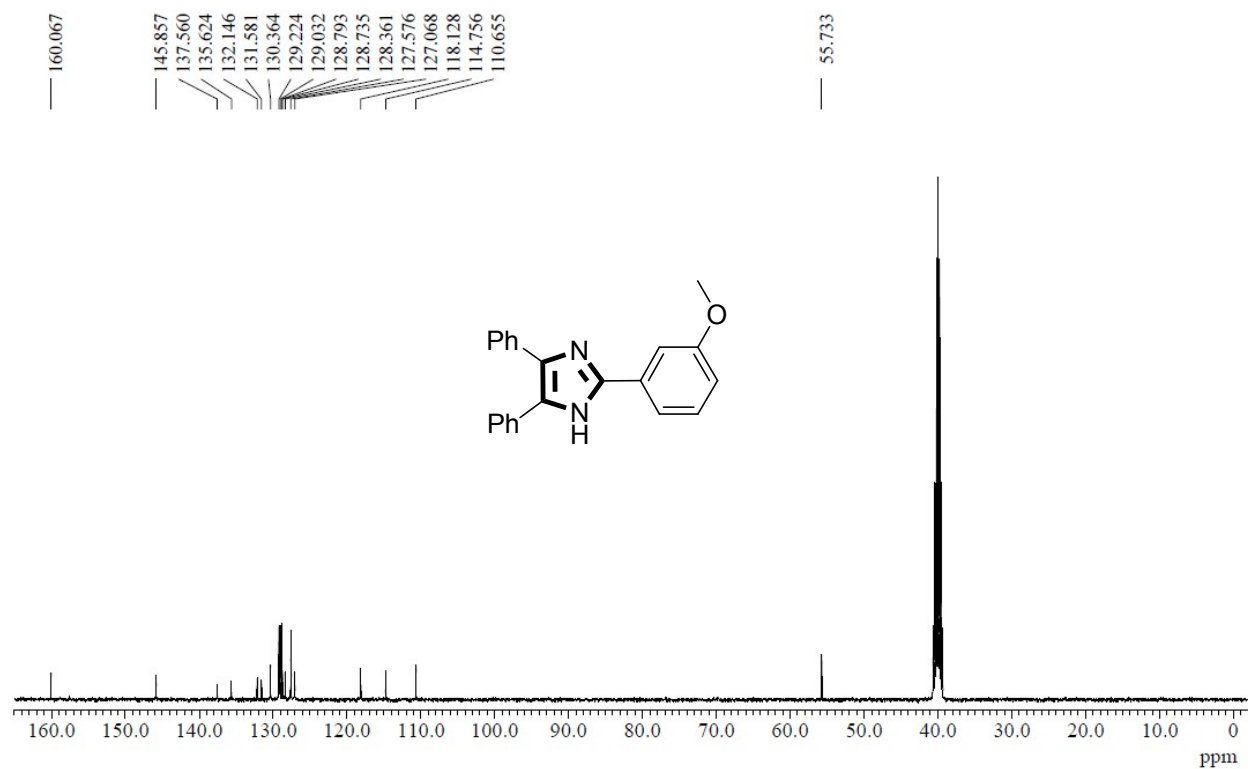

1.18 <sup>1</sup>H NMR of compound: 4j

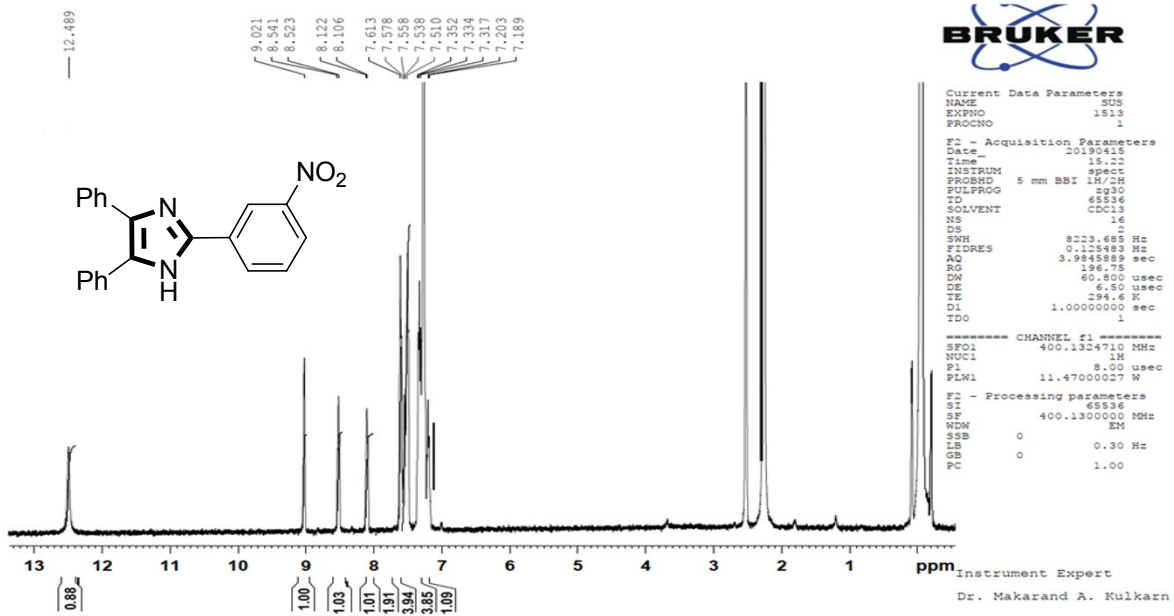

1.19 <sup>1</sup>H NMR of compound: 4k

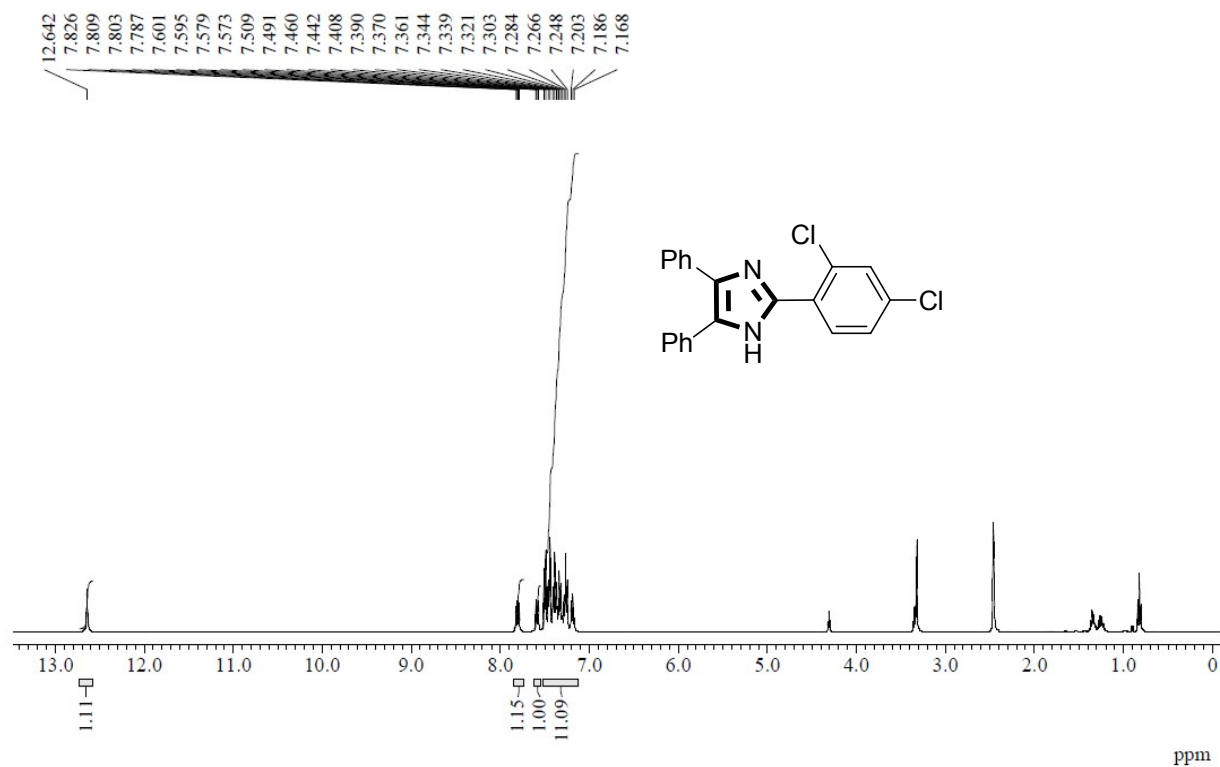

1.20 <sup>13</sup>C NMR of compound: 4k

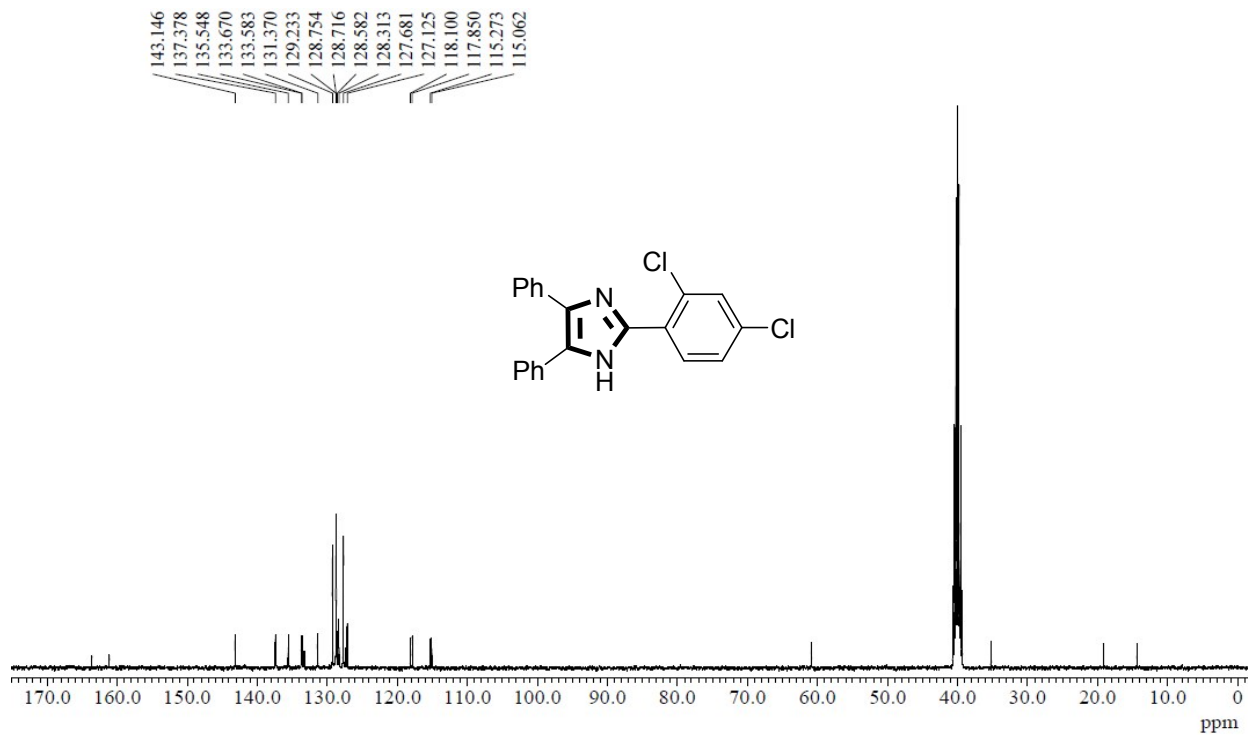

### 1.21 $^1\text{H}$ NMR of compound: **4l**

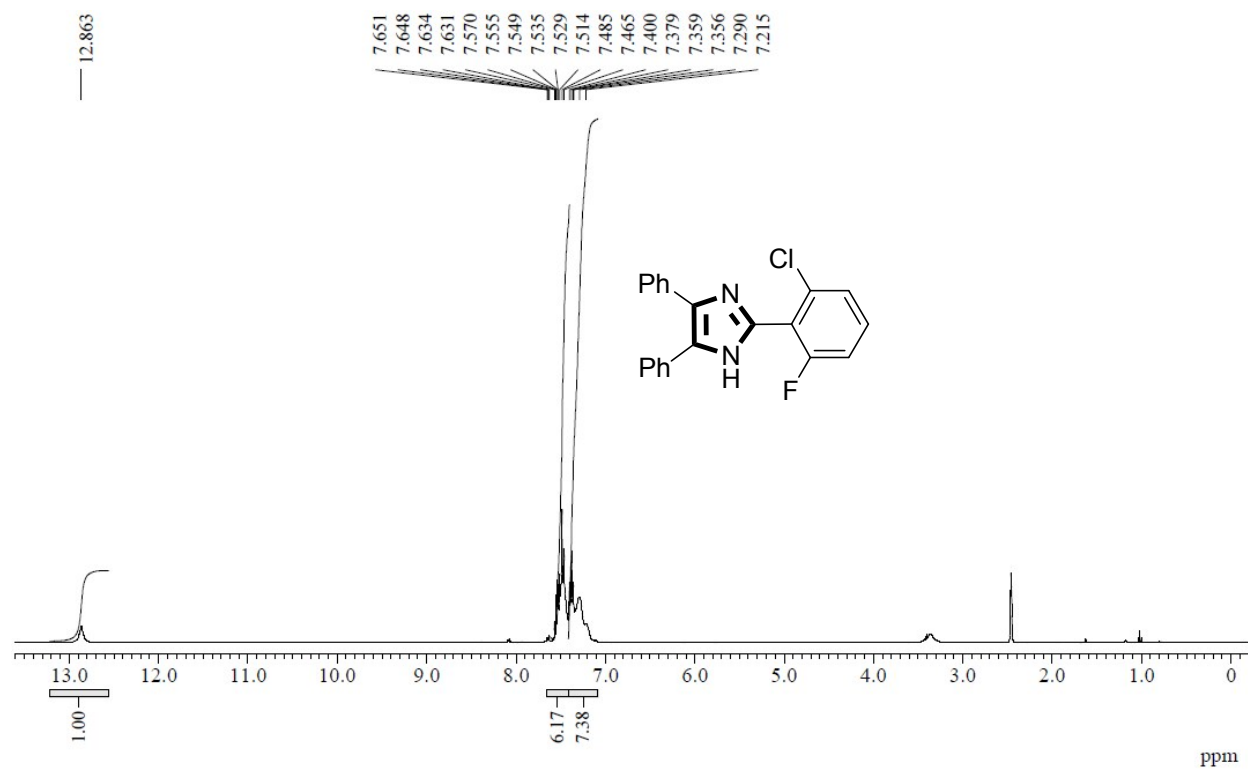

### 1.22 $^{13}\text{C}$ NMR of compound: **4l**

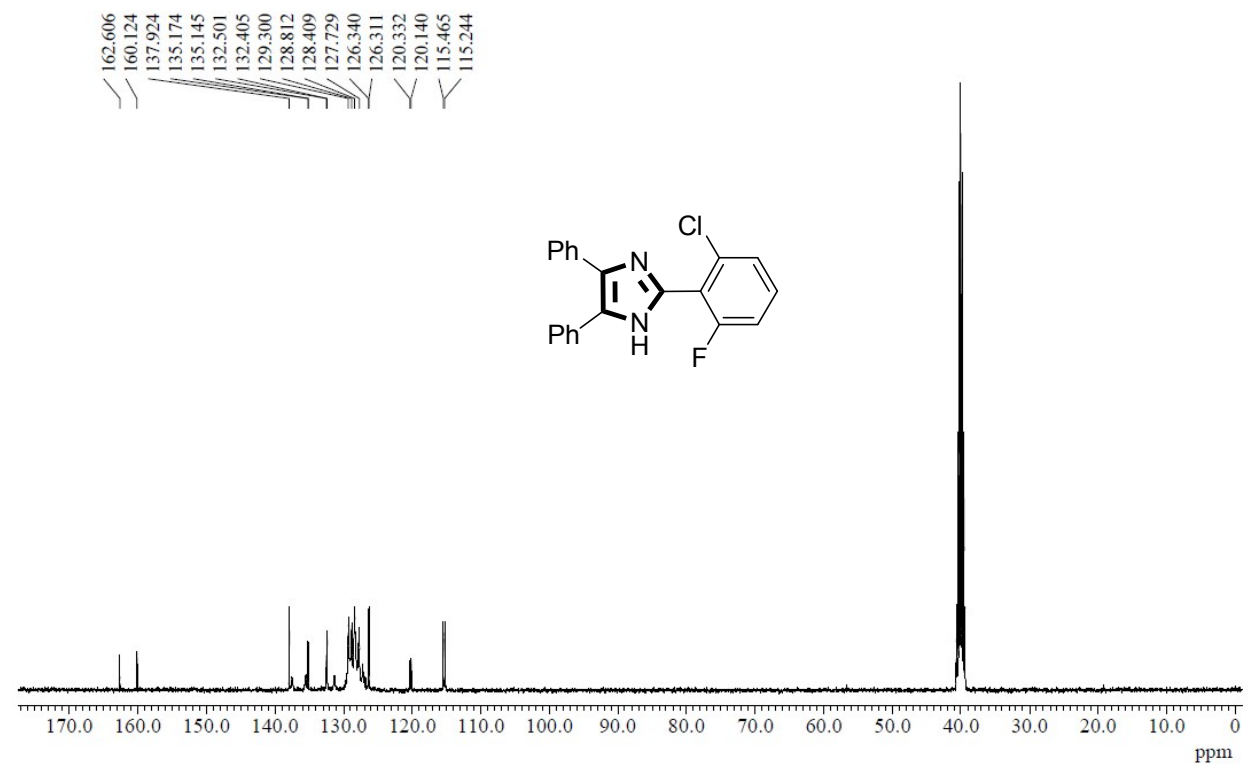

1.23  $^1\text{H}$  NMR of compound: **4m**

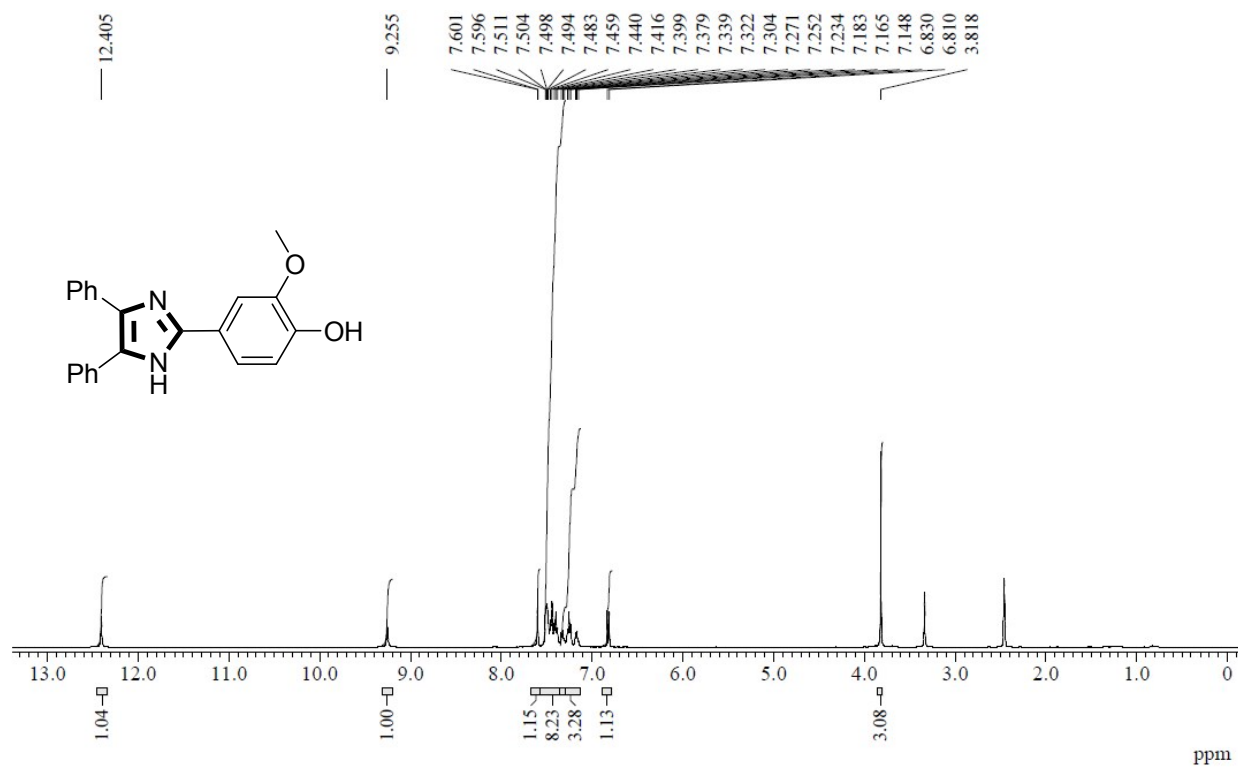

1.24  $^{13}\text{C}$  NMR of compound: **4m**

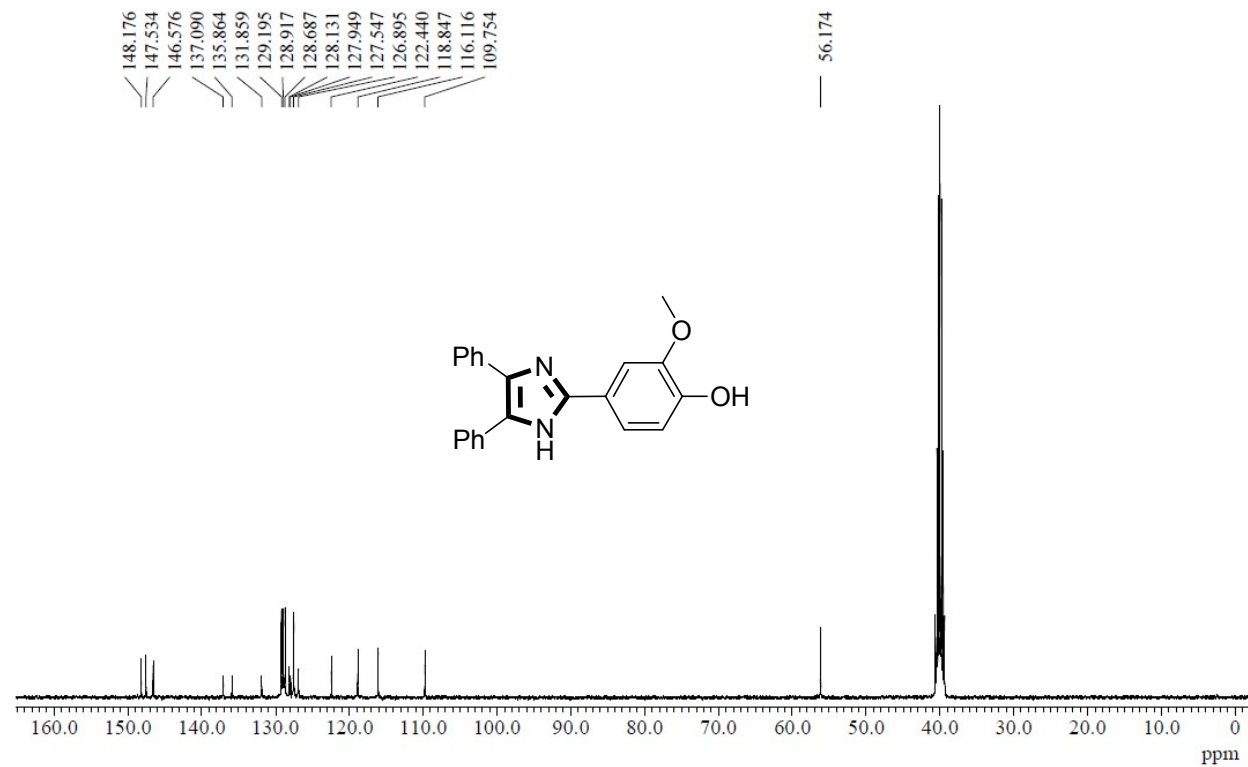

1.25  $^1\text{H}$  NMR of compound: **4n**

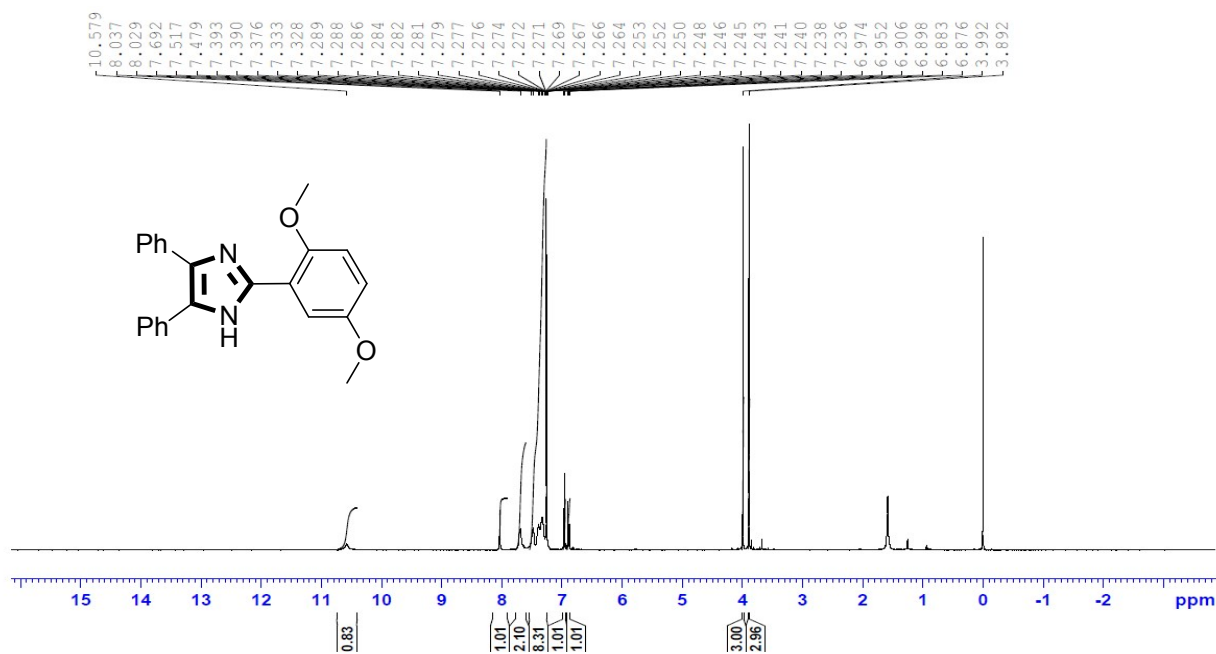

1.26  $^{13}\text{C}$  NMR of compound: **4n**

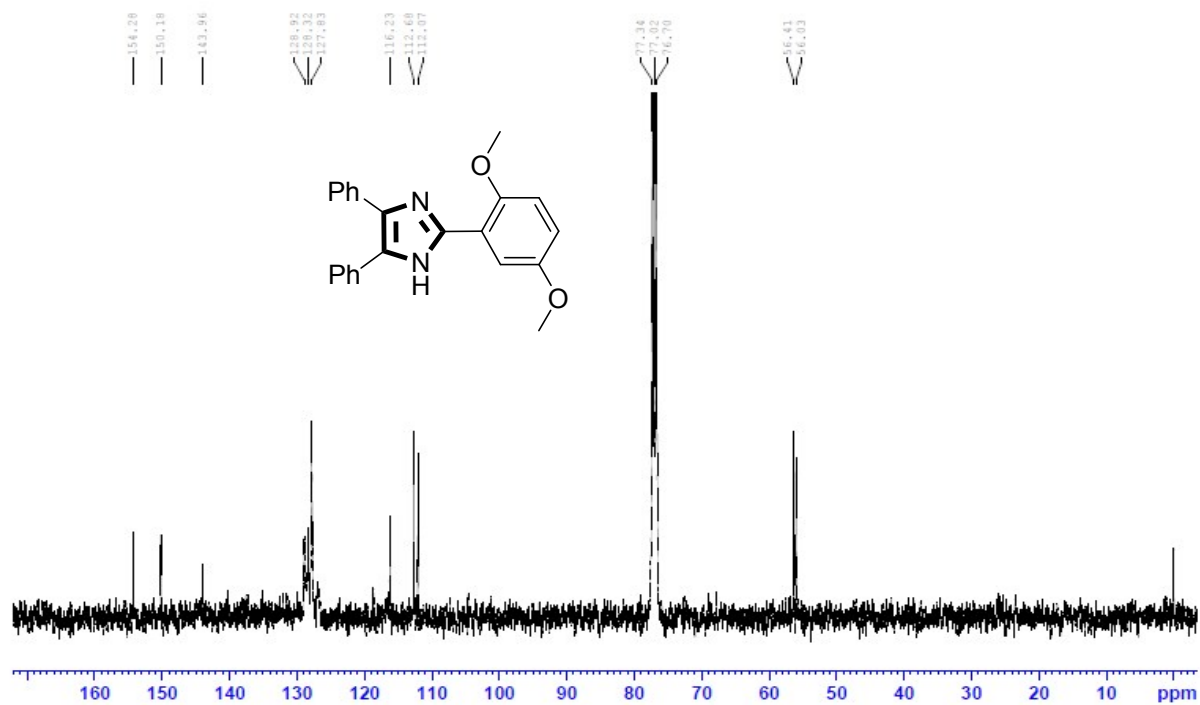

1.27 <sup>1</sup>H NMR of compound: **4o**

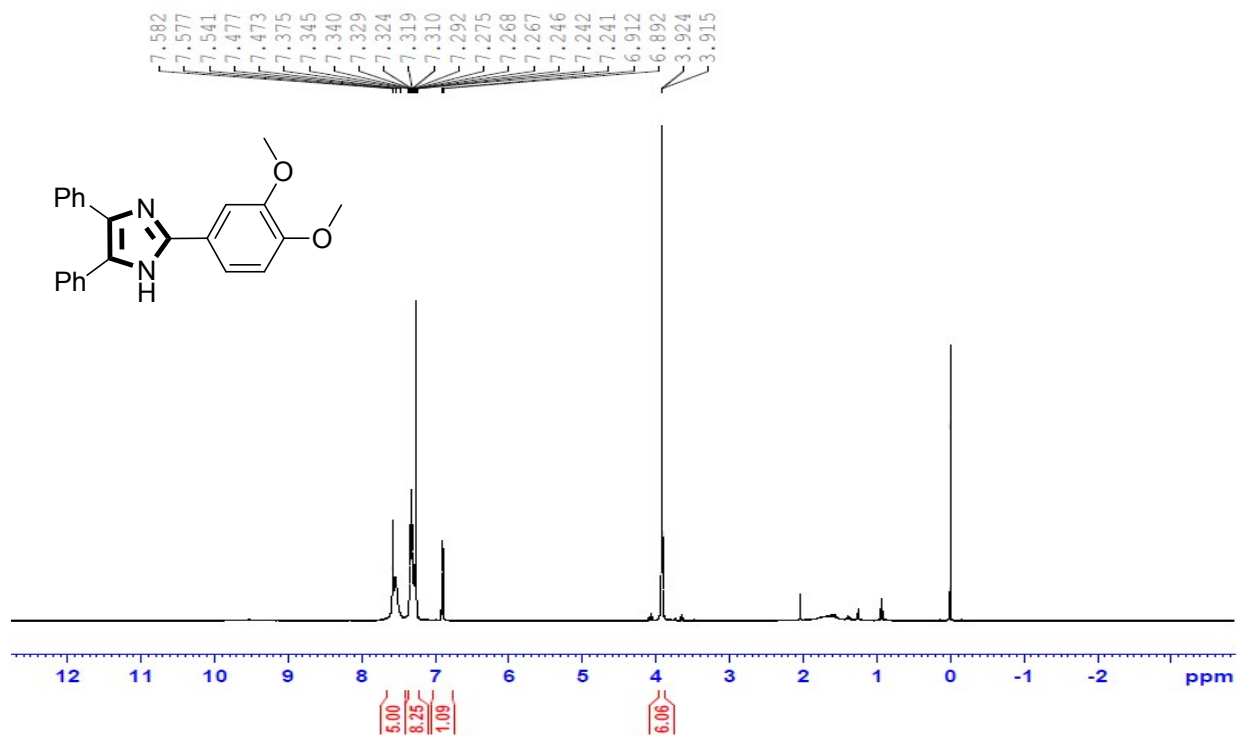

1.28 <sup>13</sup>C NMR of compound: **4o**

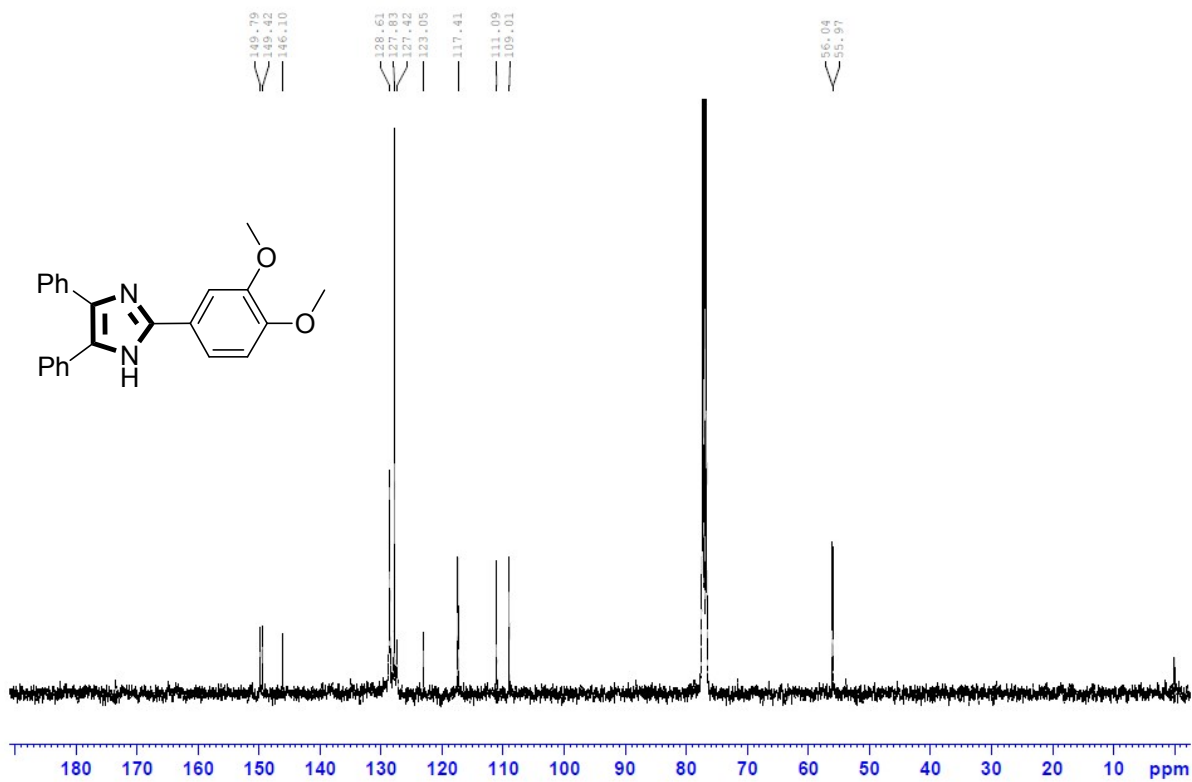



1.29  $^1\text{H}$  NMR of compound: **4p**

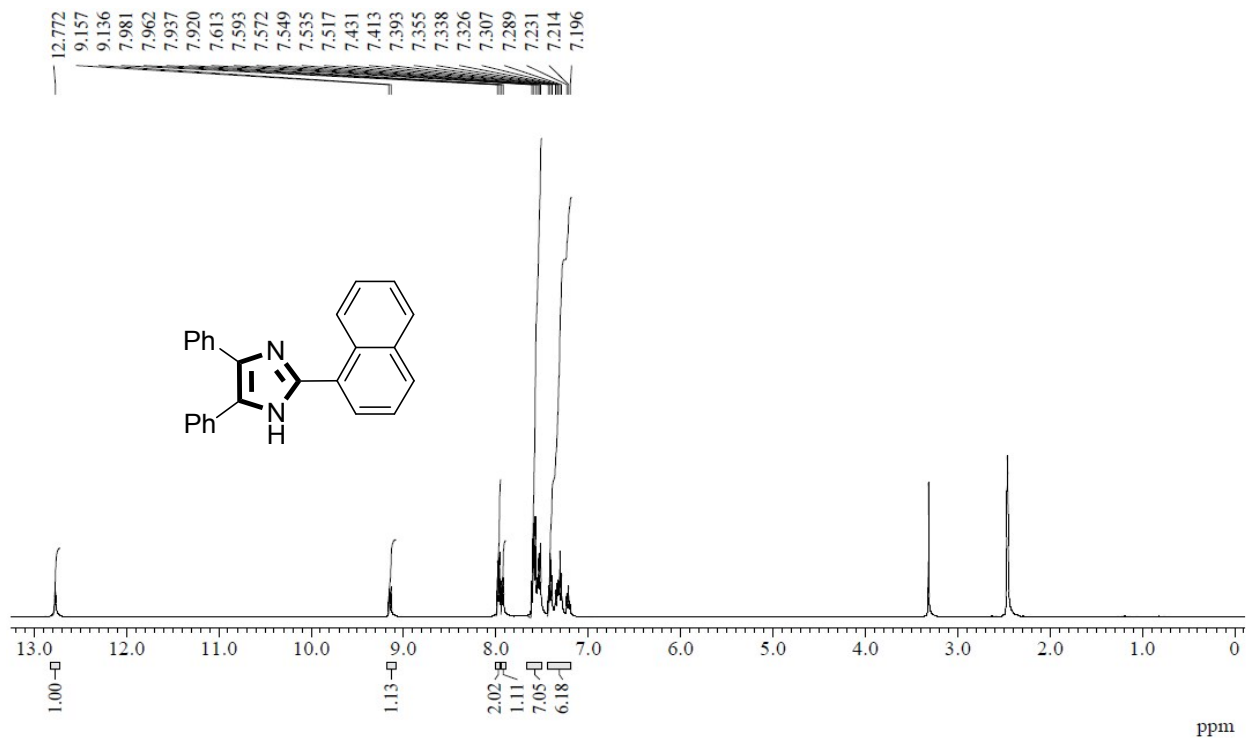

1.30  $^{13}\text{C}$  NMR of compound: **4p**

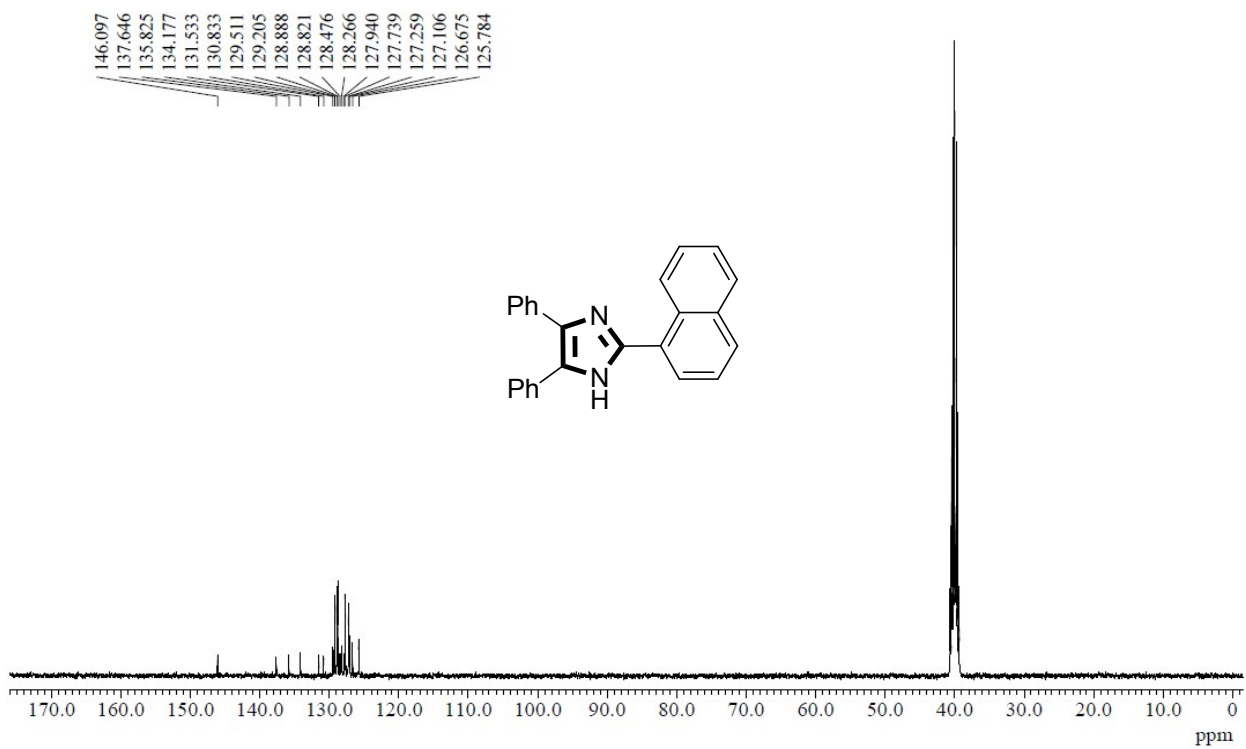

1.31 <sup>1</sup>H NMR of compound: 4q

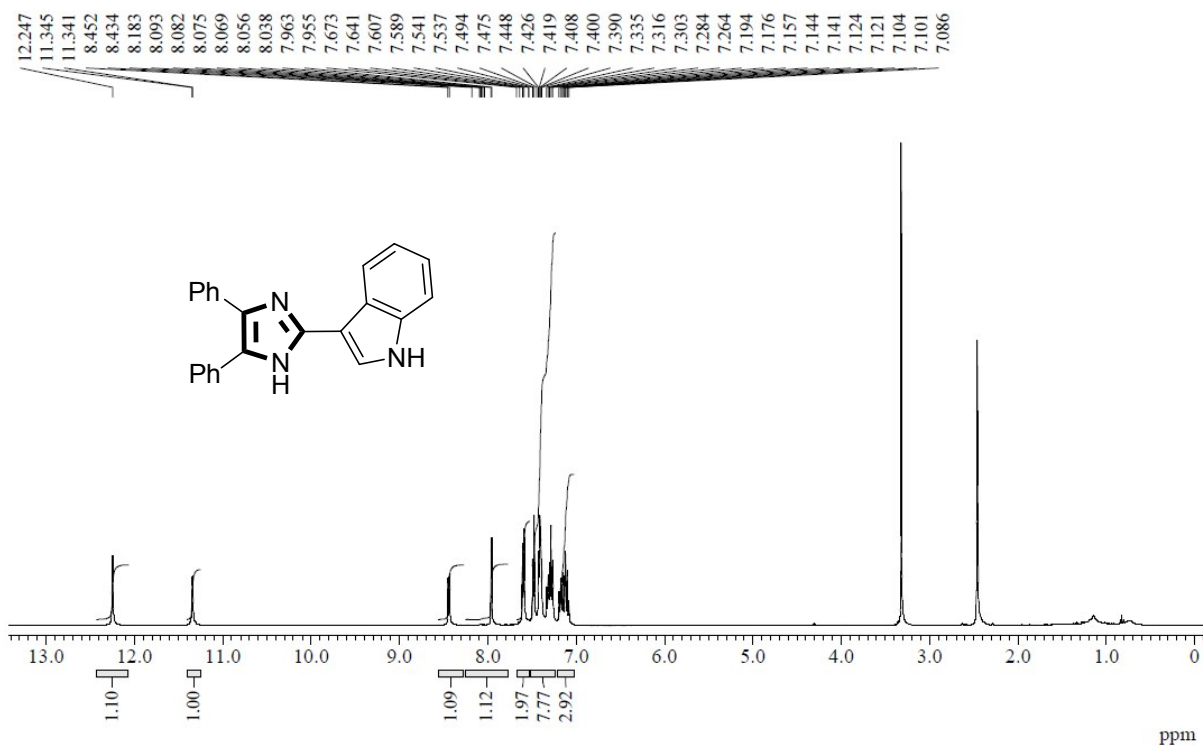

1.32 <sup>13</sup>C NMR of compound: 4q

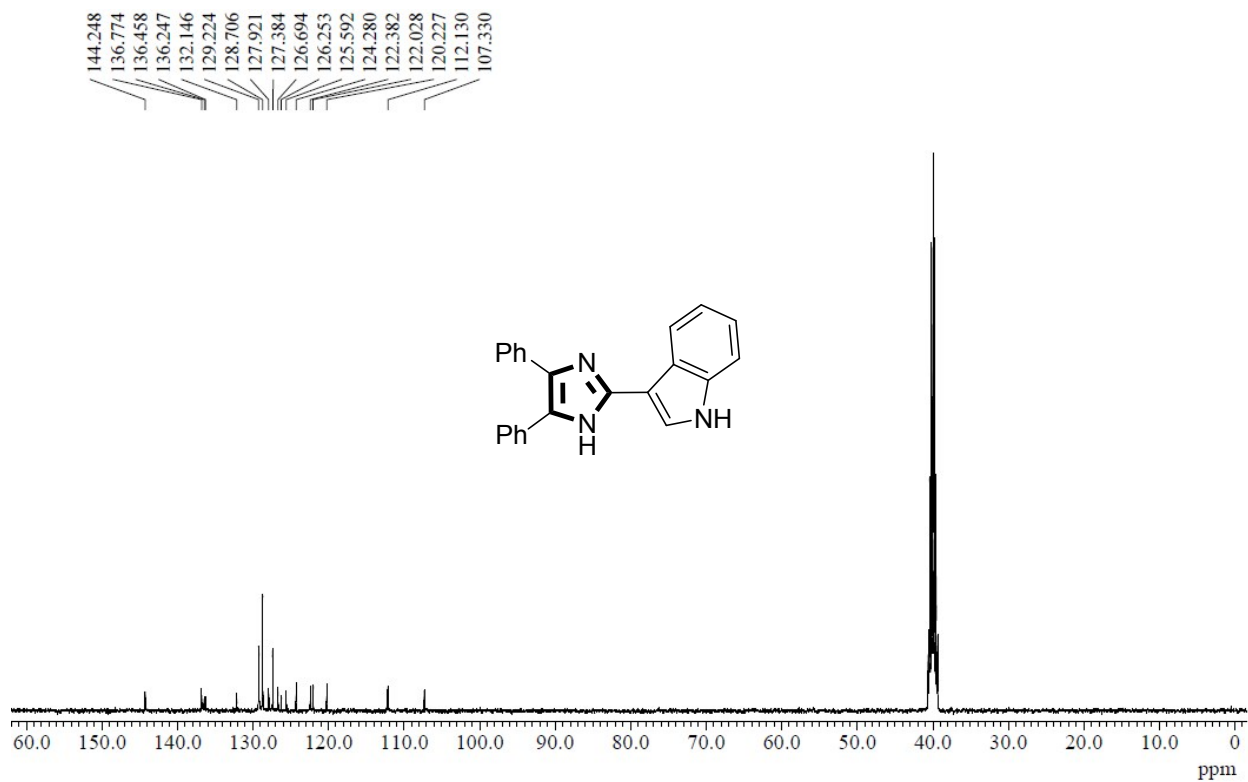

### 1.33 $^1\text{H}$ NMR of compound: **4r**

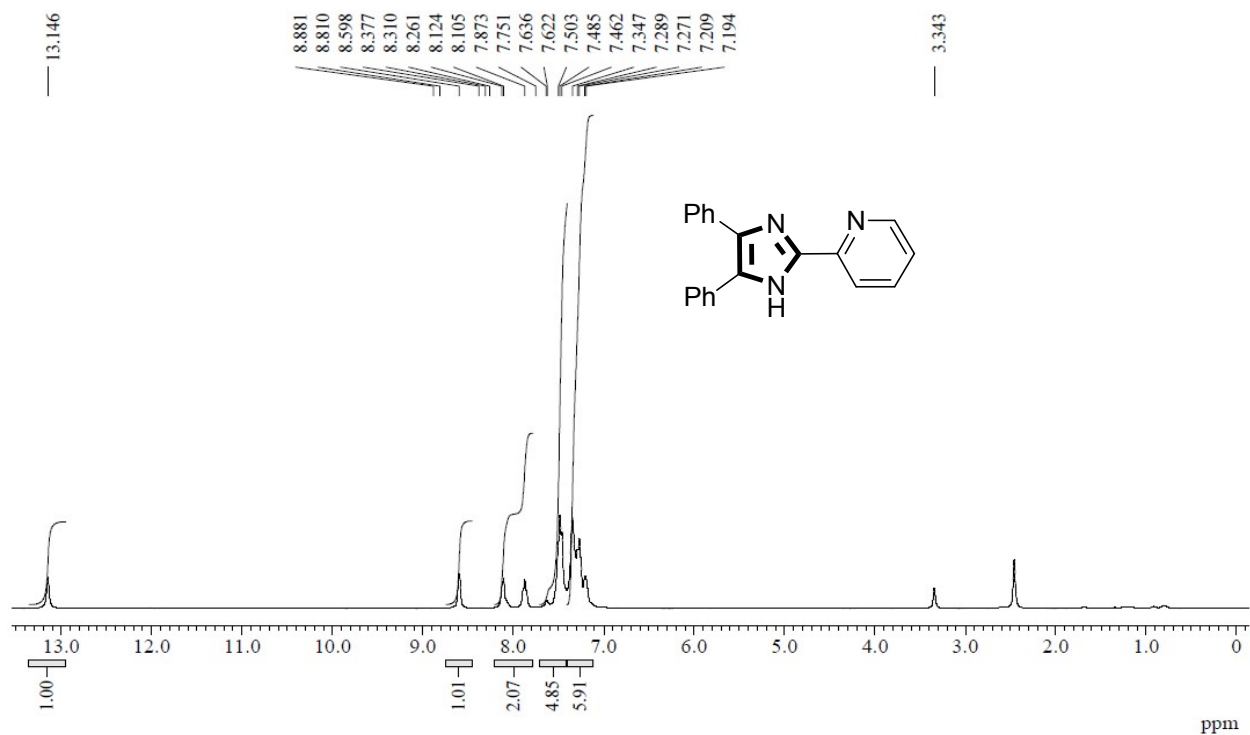

### 1.34 $^{13}\text{C}$ NMR of compound: **4r**

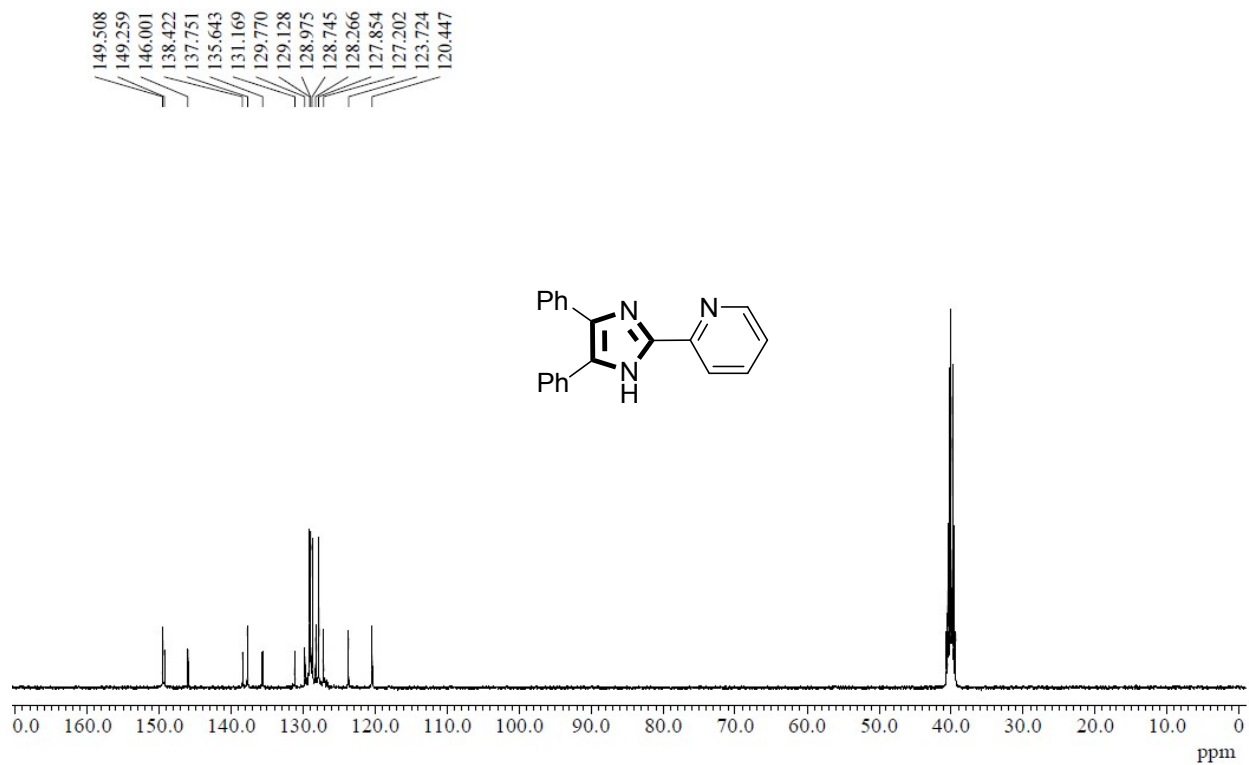

1.35  $^1\text{H}$  NMR of compound: **4s**

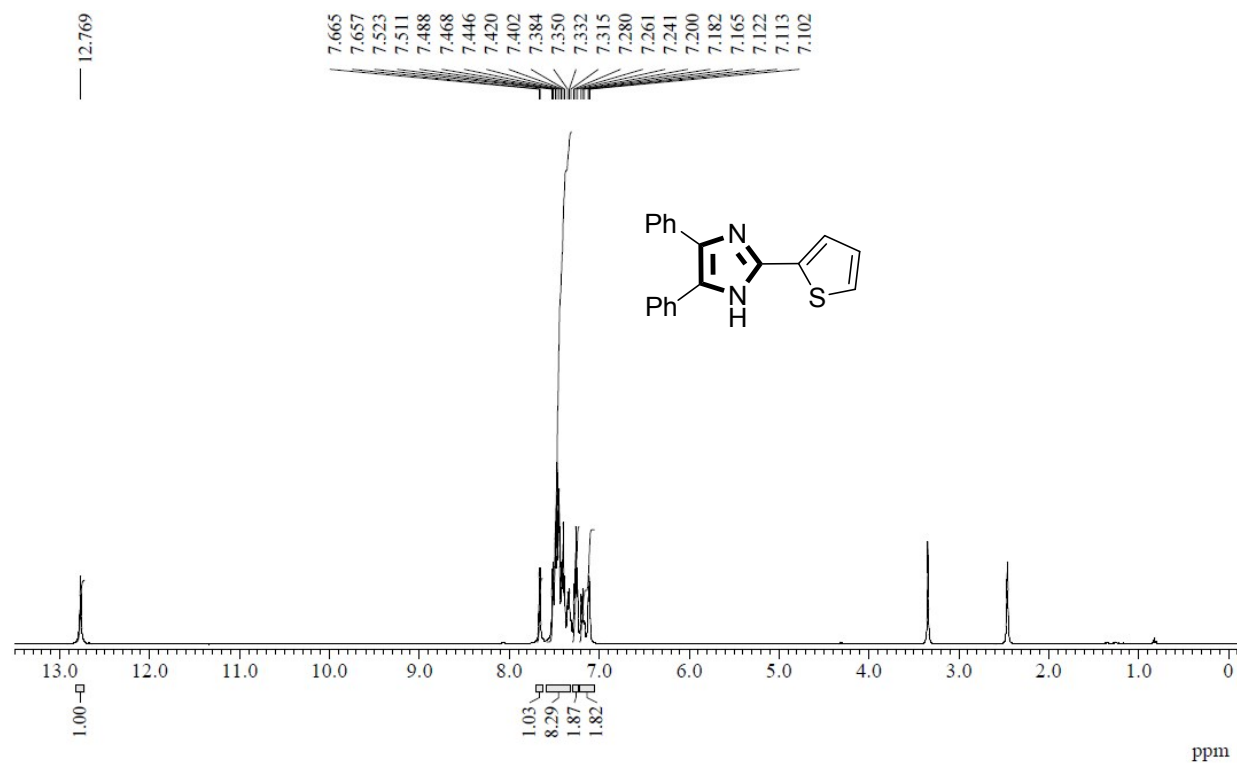

1.36  $^{13}\text{C}$  NMR of compound: **4s**

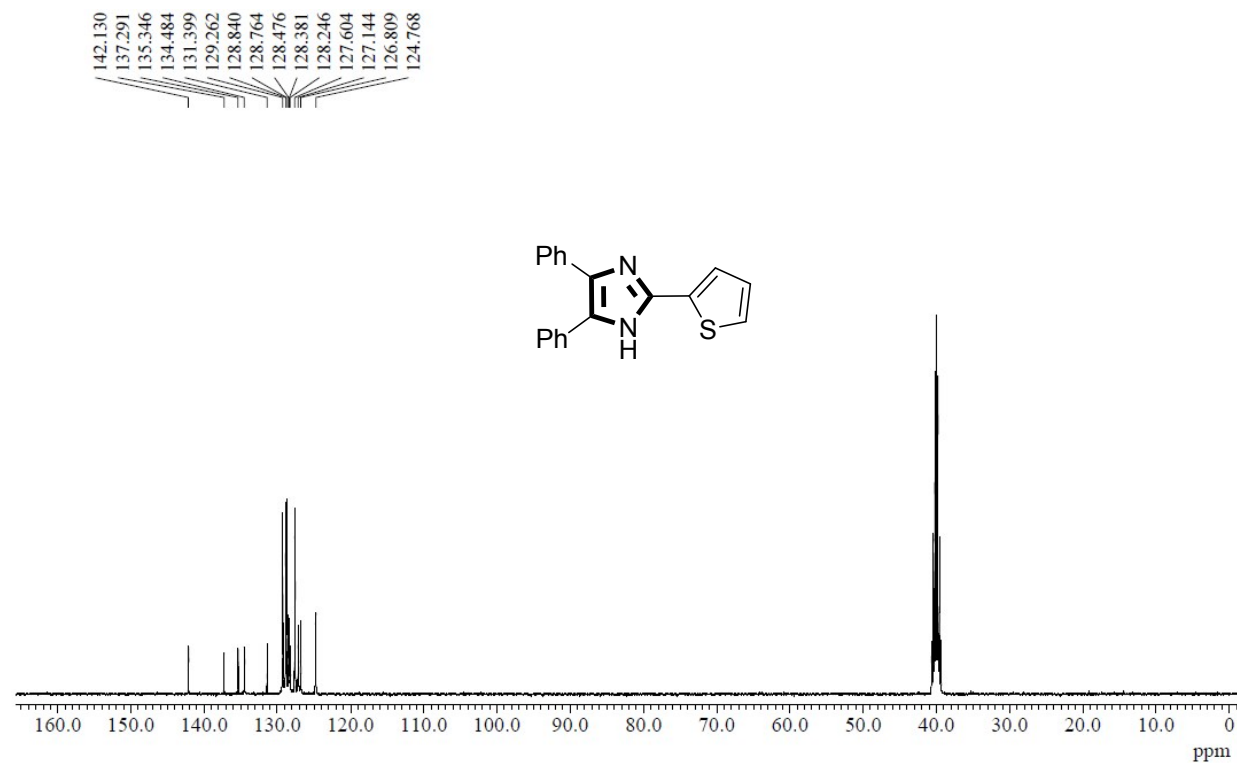

1.37  $^1\text{H}$  NMR of compound: **4t**

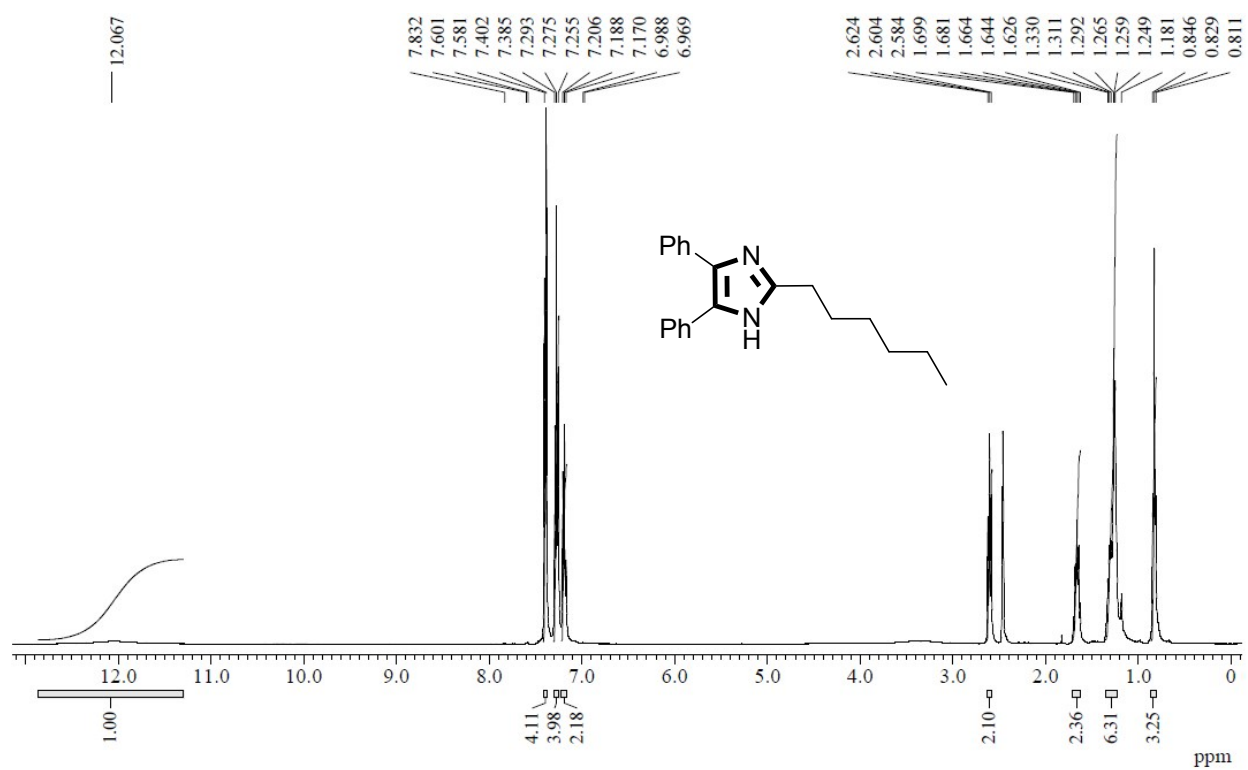

1.38  $^{13}\text{C}$  NMR of compound: **4t**

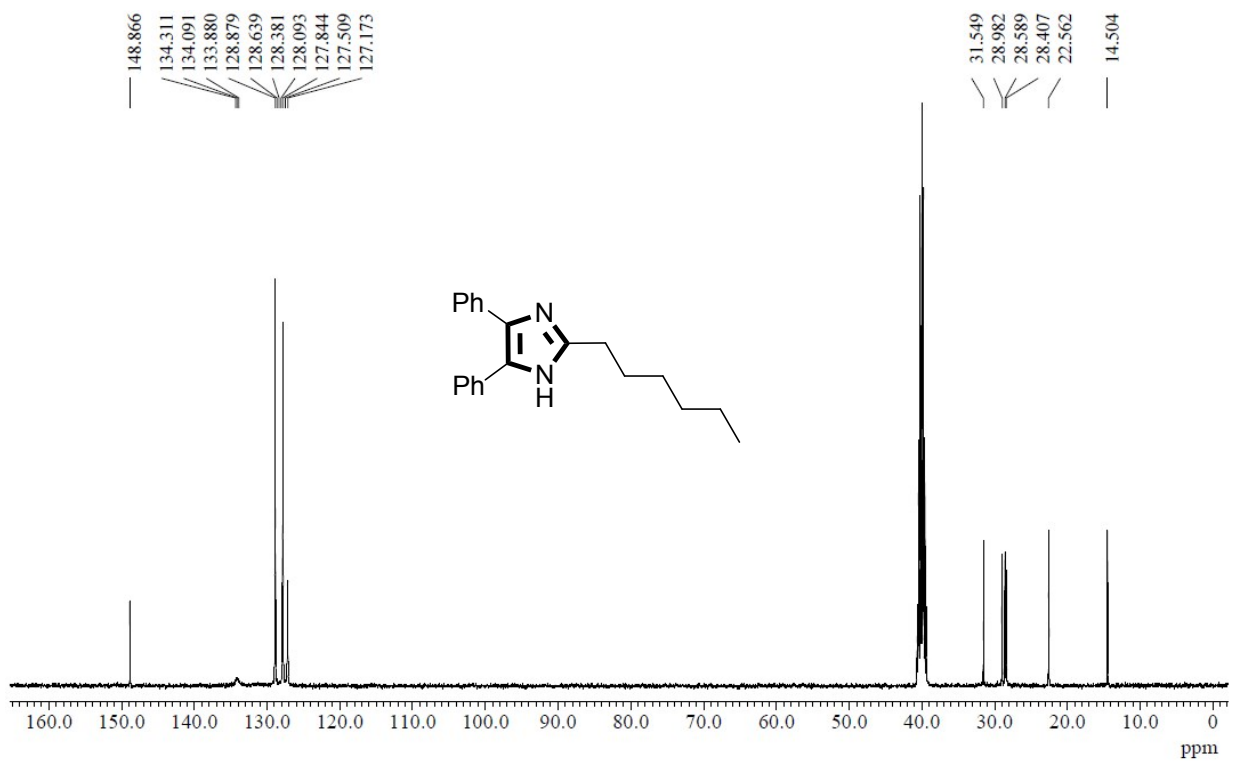

Supplement: RA-011-D1RA01767E-s001.pdf [file RA-011-D1RA01767E-s001.pdf]
